# Supplementary material for: A chemical toolbox for the study of bromodomains and epigenetic signaling
Source: Springer Nature journal article supplement (doi:10.1038/s41467-019-09672-2), 2019-04-23
Supplement: MOESM1 [file 41467_2019_9672_MOESM1_ESM.pdf]

## Supplementary information

### A Chemical Toolbox for the Study of Bromodomains and Epigenetic Signaling

Knapp and Arrowsmith et al.

#### Content:

|         |                        |
|---------|------------------------|
| Page 2  | Supplementary figure 1 |
| Page 3  | Supplementary figure 2 |
| Page 4  | Supplementary figure 3 |
| Page 6  | Supplementary table 1  |
| Page 12 | Supplementary table 2  |
| Page 14 | Supplementary table 3  |
| Page 15 | Supplementary table 4  |
| Page 16 | Supplementary table 5  |
| Page 17 | Supplementary figure 4 |

### Supplementary figure 1

**CBP30-298**

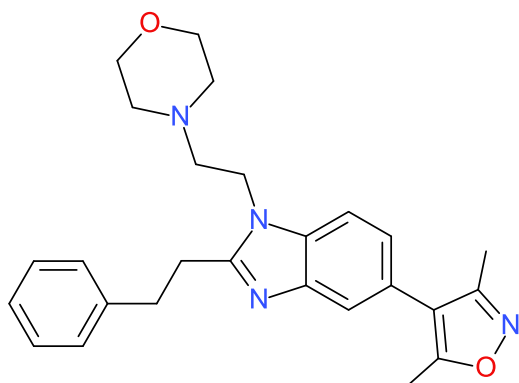

**CBP30-383**

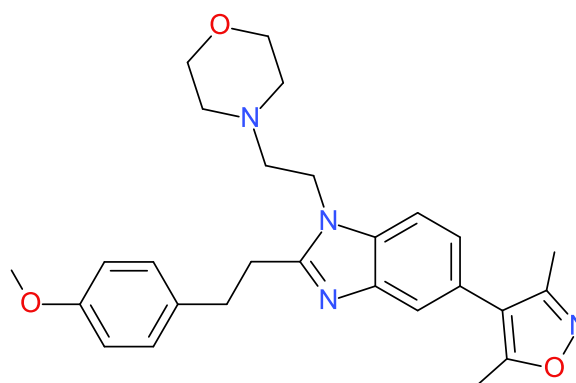

**PFI-3 D1**

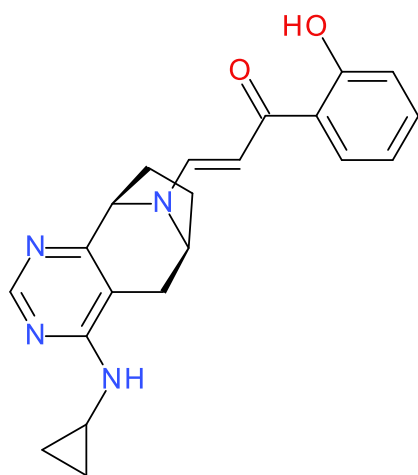

**BAY-876**

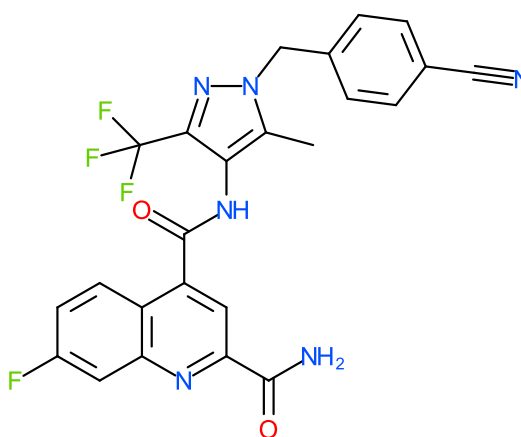

**Supplementary figure 1: Chemical Structures of probe related compounds and BAY-876.**

## Supplementary Figure 2

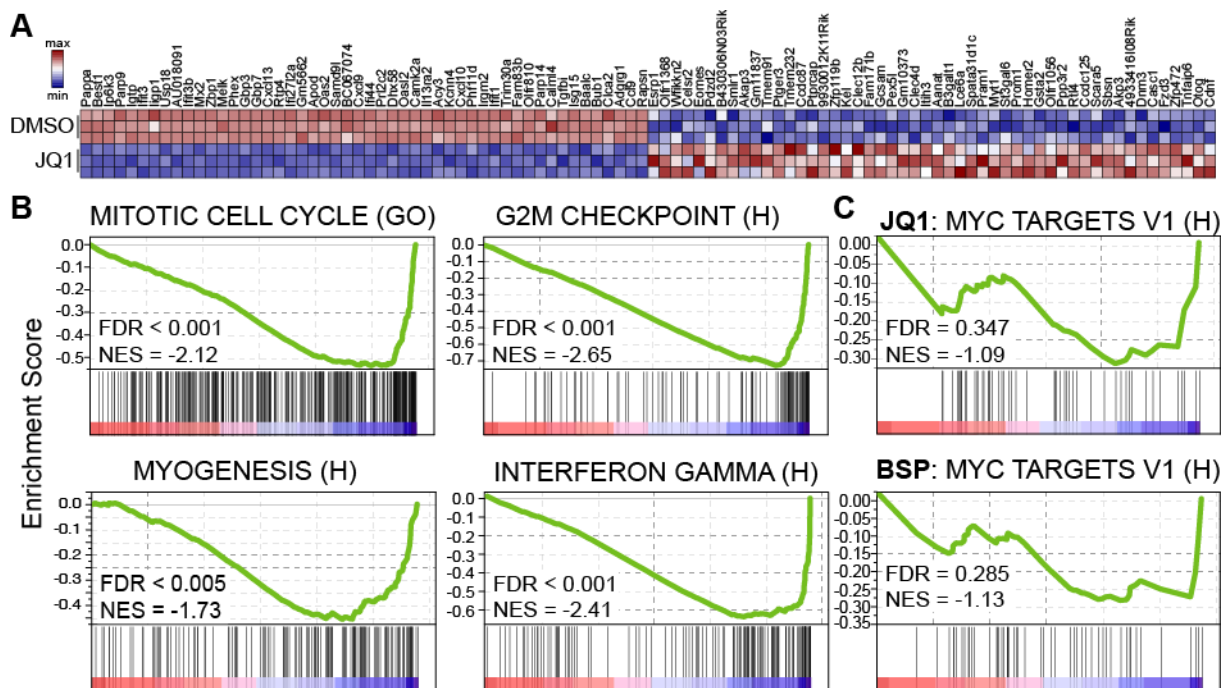

**Supplementary Figure 2: Transcriptional response to BSP and JQ1 in C2C12 myoblasts.** **A)** Heatmap of the top 50 up/down regulated genes in C2C12 myoblasts following 12 h JQ1 treatment based on 2-sided signal to noise ratio (SNR) score and  $P < 0.05$ . Dark blue indicates lowest expression; dark red indicates highest expression, with intermediate values represented by lighter shades, as indicated in the inset. Data are column-normalized. **B)** GSEA demonstrating strong association with mitotic cell cycle (from the Gene Ontology MSigDB set, top left), G2M checkpoint (from hallmark MSigDB signatures, top-right), myogenesis (from hallmark MSigDB signatures, bottom-left) and interferon gamma signalling, following 12 h treatment of C2C12 cells with JQ1. **C)** GSEA demonstrating lack of association with MYC response following 12 h treatment of C2C12 cells with JQ1 (top panel) and BSP (lower panel).

### Supplementary Figure 3

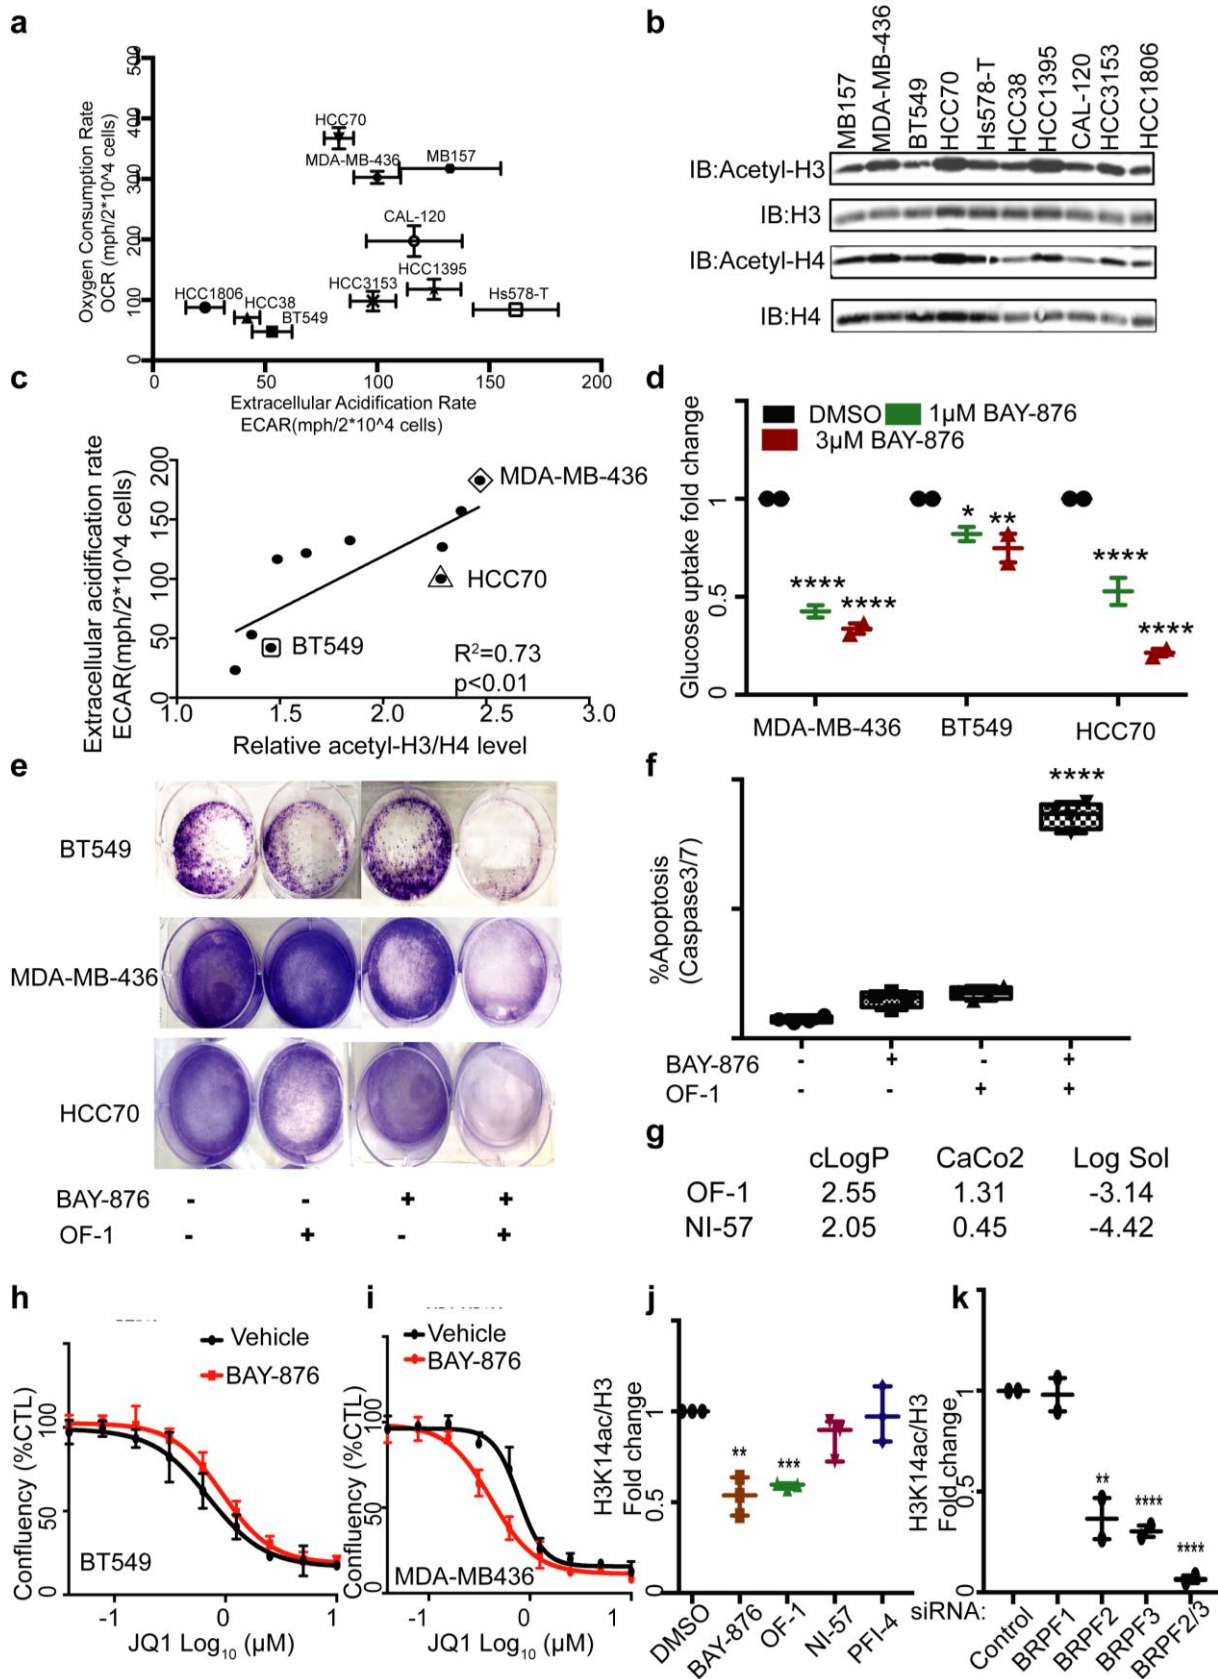

**Supplementary Figure 3: Metabolic profiles and synergy with of BRPF bromodomain inhibition with BAY-876** a) Metabolic profiles of ten TNBC lines based on Seahorse XF96 measurements. Depicted are the ECAR (X axis) and the OCR (Y axis) measurements. Graph

indicate mean and error bars denote standard deviation from eight wells (from two independent assays). **b)** A representative immunoblot of histone acetylation level across ten TNBC lines. **c)** Plot of ECAR and histone acetylation across ten TNBC lines. Labeled dots denote the representative TNBC lines, having extreme or medial glycolytic rates and histone acetylation levels, used for the following assays. **d)** Glucose uptake in three representative cell lines in respond to BAY-876 treatment relative to vehicle. Experiment repeated two times. Cells were treated with DMSO or indicated concentration of BAY-876 for 5 days. Graph indicate mean and error bars denote standard deviation from three independent assays. p value computed using a one-way ANOVA test; \*\*\*\* p<0.001. **e)** The colony formation of indicated cells with 3µM indicated chemical probes treatment for 14 days. **f)** MDA-MB436 cells were treated with 3µM indicated chemical probes for 5 days. Cell apoptotic activity was quantified by the fluorescent caspase 3/7 active objects. Graph indicate mean and error bars denote standard deviation from four independent assays. p value computed using one-way ANOVA t test; \*\*\*\* p<0.001. **g)** Pharmacokinetic properties of NI-57 and OF-1 predicted by pkCSM (<http://biosig.unimelb.edu.au/pkcsm/prediction>). **h)** Dose dependent curves for cell lines treated with indicated concentrations of JQ-1 with or without 3µM BAY876 for 7 days in BT549 cell line. Graph indicate mean and error bars denote standard deviation from four independent assays. p value computed using a two- stage step-up Benjamini t test **i)** Dose dependent curves for cell lines treated with indicated concentrations of JQ-1 with or without 3µM BAY876 for 7 days in MDA-MB-436 cell line. Graph indicate mean and error bars denote standard deviation from four independent assays. p value computed using a two- stage step-up Benjamini t test **j)** Immunoblot based quantification of H3K14ac abundance using total H3 as a control in MDA-MB-436 cells following control or 3 µM of the indicated chemical probes during a 5-day treatment. Graph indicate mean and error bars denote standard deviation from three independent assays. p value computed using a two-stage step-up Benjamini t test; \*\*p<0.01; \*\*\* p<0.001. **k)** Immunoblot based quantification of H3K14ac abundance using total H3 as a control in MDA-MB-436 BRPF knockdown cells. Graph indicate mean and error bars denote standard deviation from two independent assays. p value computed using a two-stage step-up Benjamini t test; \*\*p<0.01; \*\*\* p<0.001.

**Supplementary Table 1: Probe set for the human bromodomain family**

| Target                            | Inhibitor<br>Negative control<br>Supplier <sup>†</sup>                                   | SMILE | K <sub>D</sub> (nM)                                                                                                           | Ref. |
|-----------------------------------|------------------------------------------------------------------------------------------|-------|-------------------------------------------------------------------------------------------------------------------------------|------|
| Family I:<br>PCAF/GCN5            | L-Moses<br><br>Negative control: D-Moses<br><br>Probe: T<br>Control: <a href="#">SGC</a> |       | ITC data:<br>126 nM<br>PCAF<br>600 nM<br>GCN5                                                                                 | 1    |
| Family I:<br>PCAF/GCN5            | GSK4027<br><br>Negative control: GSK4028<br><a href="#">SGC</a>                          |       | BROMOscan<br>1.4nM PCAF<br>1.4nM GCN5                                                                                         | 2    |
| Family I:<br>CECR2                | NVS-CECR2-1<br><br>C, M, T                                                               |       | ITC data:<br>80nM CECR2                                                                                                       | 3    |
| Family I:<br>CECR2                | GNE-886<br><br>MedKoo                                                                    |       | EC <sub>50</sub><br>370nM<br>CECR2                                                                                            | 4    |
| Family 2<br>BET (BRD4,<br>3, 2,T) | (+)-JQ1<br><br>Negative control:<br>(-)-JQ1<br><br>C, M, T                               |       | ITC data:<br>49nM<br>BRD4(1)<br>90nM<br>BRD4(2)<br>59nM<br>BRD3(1)<br>82nM<br>BRD3(2)<br>128nM<br>BRD2(1)<br>190nM<br>BRDT(1) | 5    |
| Family 2<br>BET (BRD4,<br>3, 2,T) | I-BET151<br><br>C, T                                                                     |       | Cell free<br>assay<br>IC <sub>50</sub> of 500<br>nM, 25 nM,<br>and 790nM                                                      | 6    |

|                                                      |                                                                                                                                            |                                                                                      |                                                                                                                                                                                                 |                  |
|------------------------------------------------------|--------------------------------------------------------------------------------------------------------------------------------------------|--------------------------------------------------------------------------------------|-------------------------------------------------------------------------------------------------------------------------------------------------------------------------------------------------|------------------|
| <p><b>Family 2</b><br/><b>BET (BRD4, 3, 2,T)</b></p> | <p><b>PFI-1</b><br/><b>C, M, T</b></p>                                                                                                     | 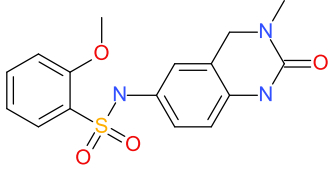    | <p>ITC data:<br/>47nM<br/>BRD4(1)<br/>195nM<br/>BRD4(2)<br/>80nM<br/>BRD3(1)<br/>76nM<br/>BRD3(2)<br/>108nM<br/>BRD2(1)<br/>144nM<br/>BRD2(2)</p> <p>85nM<br/>BRDT(1)<br/>221nM<br/>BRDT(2)</p> | <p><b>7</b></p>  |
| <p><b>Family III</b><br/><b>CBP/p300</b></p>         | <p><b>SGC-CBP30</b><br/><b>Negative control:</b><br/><b>BDOIA513</b><br/><b>Probe: C, M, T</b><br/><b>Control: <a href="#">SGC</a></b></p> |   | <p>ITC data:<br/>21nM CBP<br/>38nM p300</p>                                                                                                                                                     | <p><b>8</b></p>  |
| <p><b>Family III</b><br/><b>CBP/p300</b></p>         | <p><b>I-CBP112</b><br/><b>C, M, T</b></p>                                                                                                  |  | <p>ITC data:<br/>151nM CBP<br/>625nM p300</p>                                                                                                                                                   | <p><b>9</b></p>  |
| <p><b>Family III</b><br/><b>CBP/p300</b></p>         | <p><b>GNE-781</b><br/><b>MedKoo</b></p>                                                                                                    |  | <p>TR-FRET:<br/>0.94 nM<br/>BRET:<br/>6.2 nM</p>                                                                                                                                                | <p><b>10</b></p> |
| <p><b>Family IV</b><br/><b>pan-BRPF</b></p>          | <p><b>OF-1</b><br/><b>C, M, T</b></p>                                                                                                      |  | <p>ITC data:<br/>101nM<br/>BRPF1B<br/>505nM<br/>BRPF2<br/>240nM<br/>BRPF3</p> <p>Off target<br/>BRD4(1)<br/>3900 nM</p>                                                                         | <p><b>11</b></p> |

|                                                                                                          |                                                                                                                          |                                                                                      |                                                                                                                              |                  |
|----------------------------------------------------------------------------------------------------------|--------------------------------------------------------------------------------------------------------------------------|--------------------------------------------------------------------------------------|------------------------------------------------------------------------------------------------------------------------------|------------------|
| <p><b>Family IV</b><br/><b>pan-BRPF</b></p>                                                              | <p><b>GSK6853</b></p> <p><b>Negative control:</b><br/><b>GSK9311</b></p> <p><b>Probe: C, M</b><br/><b>Control: M</b></p> | 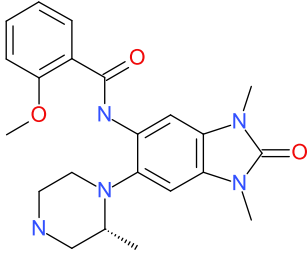   | <p>TR-FRET<br/>81nM<br/>BRPF1B</p>                                                                                           | <p><b>12</b></p> |
| <p><b>Family IV</b><br/><b>pan-BRPF</b></p>                                                              | <p><b>NI-57</b></p> <p><b>C, M, T</b></p>                                                                                |    | <p>ITC data:<br/>31nM<br/>BRPF1B<br/>108nM<br/>BRPF2<br/>409nM<br/>BRPF3<br/>Off target<br/>BRD9<br/>998nM</p>               | <p><b>11</b></p> |
| <p><b>Family IV</b><br/><b>BRPF1B</b></p>                                                                | <p><b>PFI-4</b></p> <p><b>C, M, T</b></p>                                                                                |    | <p>ITC data:<br/>13nM<br/>BRPF1B<br/>775nM<br/>BRPF2<br/>Off target<br/>CECR2<br/>2350nM</p>                                 | <p><b>11</b></p> |
| <p><b>Family IV</b><br/><b>BRPF2</b></p> <p><b>Family VII</b><br/><b>TAF1(2)</b><br/><b>Taf1L(2)</b></p> | <p><b>BAY-299</b></p> <p><b>Negative control:</b><br/><b>BAY-364</b></p> <p><b>C, M, T</b></p>                           |  | <p>ITC data:<br/>44nM BRPF2<br/>16nM<br/>TAF1(2)<br/>234nM<br/>TAF1L(2)</p> <p>Off target<br/>1390nM CBP</p>                 | <p><b>13</b></p> |
| <p><b>Family IV</b><br/><b>BRD7/BRD9</b></p>                                                             | <p><b>TP-472</b></p> <p><b>Negative control:</b><br/><b>TP-472N</b></p> <p><b>C, M, T</b></p>                            |  | <p>ITC data:<br/>33nM BRD9<br/>340nM BRD7</p>                                                                                | <p><b>14</b></p> |
| <p><b>Family IV</b><br/><b>BRD7/BRD9</b></p>                                                             | <p><b>BI-9564</b></p> <p><b>C, M, T</b></p>                                                                              |  | <p>ITC data:<br/>15nM BRD9<br/>BROMOscan<br/>0.75nM<br/>BRD9<br/>0.3 nM BRD7<br/>Off target<br/>ITC<br/>CECR2:<br/>187nM</p> | <p><b>15</b></p> |



|                                                                                  |                                                                                                                                            |                                                                                      |                                                                                                                                          |                  |
|----------------------------------------------------------------------------------|--------------------------------------------------------------------------------------------------------------------------------------------|--------------------------------------------------------------------------------------|------------------------------------------------------------------------------------------------------------------------------------------|------------------|
| <p><b>Family IV</b><br/><b>BRD7/BRD9</b></p>                                     | <p><b>LP-99</b><br/><b>Negative control:</b><br/><b>(2S,3R)-LP99</b><br/><b>Probe: C, M, T</b><br/><b>Control: <a href="#">SGC</a></b></p> | 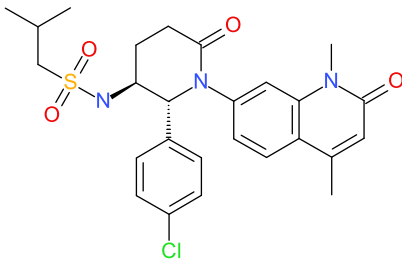   | <p>ITC data:<br/>99nM BRD9<br/>909nM BRD7</p>                                                                                            | <p><b>16</b></p> |
| <p><b>Family IV</b><br/><b>BRD7/BRD9</b></p>                                     | <p><b>I-BRD9</b><br/><b>C, M, T</b></p>                                                                                                    |    | <p>BROMOscan:<br/>1.9 nM BRD9<br/>380nM BRD7</p> <p>Off target<br/>CECR2<br/>140nM<br/>CBP 740nM<br/>p300 770nM<br/>BRPF1<br/>2100nM</p> | <p><b>17</b></p> |
| <p><b>(BRPF1B)</b><br/><b>(ATAD2</b><br/><b>8Family IV</b><br/><b>ATAD2B</b></p> | <p><b>GSK8814</b><br/><b>Negative control:</b><br/><b>GSK8815</b><br/><b><a href="#">SGC</a></b></p>                                       |   | <p>ITC<br/>10 nM<br/>ATAD2B</p>                                                                                                          | <p><b>18</b></p> |
| <p><b>Family IV</b><br/><b>and VI</b><br/><b>TRIM24</b><br/><b>BRPF1</b></p>     | <p><b>Benzimidazolone 8</b><br/><b><a href="#">SGC</a></b></p>                                                                             |  | <p>ITC<br/>220nM<br/>TRIM24<br/>140nM<br/>BRPF1B<br/>1240nM<br/>BRPF2</p>                                                                | <p><b>19</b></p> |
| <p><b>Family IV</b><br/><b>ATAD2A</b></p>                                        | <p><b>BAY-850</b><br/><b>Negative control:</b><br/><b>BAY-460</b><br/><b><a href="#">SGC</a></b></p>                                       |  | <p>BROMOscan<br/>120nM<br/>ATAD2A</p>                                                                                                    | <p><b>20</b></p> |
| <p><b>Family VI</b><br/><b>BAZ2A/B</b></p>                                       | <p><b>BAZ2-ICR</b><br/><b>C, M, T</b></p>                                                                                                  |  | <p>ITC:<br/>109nM<br/>BAZ2A<br/>170nM<br/>BAZ2B</p> <p>Off-target<br/>1550nM<br/>CECR2</p>                                               | <p><b>21</b></p> |
| <p><b>Family VI</b><br/><b>BAZ2A/B</b></p>                                       | <p><b>GSK2801</b><br/><b>Negative control:</b><br/><b>GSK8573</b><br/><b>Probe: C, M, T</b></p>                                            |  | <p>ITC:<br/>257nM<br/>BAZ2A<br/>136nM<br/>BAZ2B</p>                                                                                      | <p><b>22</b></p> |

|                                             |                                                                                                                                  |                                                                                    |                                                |           |
|---------------------------------------------|----------------------------------------------------------------------------------------------------------------------------------|------------------------------------------------------------------------------------|------------------------------------------------|-----------|
| <b>Family VIII<br/>SMARCA2/4<br/>PB1(5)</b> | <b>PFI-3</b><br><br><b>Negative control:<br/>BDF25488524</b><br><br><b>Probe: C, M, T</b><br><b>Control: <a href="#">SGC</a></b> | 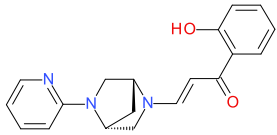 | <b>ITC:</b><br>89nM<br>SMARCA4<br>48nM PB1 (5) | <b>23</b> |
|---------------------------------------------|----------------------------------------------------------------------------------------------------------------------------------|------------------------------------------------------------------------------------|------------------------------------------------|-----------|

‡Cayman Chemical (C), Millipore-Sigma (M), Tocris (T)

## References:

1. Moustakim, M. et al. Discovery of a PCAF Bromodomain Chemical Probe. *Angew Chem Int Ed Engl* **56**, 827-831 (2017).
2. Humphreys, P.G. et al. Discovery of a Potent, Cell Penetrant, and Selective p300/CBP-Associated Factor (PCAF)/General Control Nonderepressible 5 (GCN5) Bromodomain Chemical Probe. *J Med Chem* **60**, 695-709 (2017).
3. SGC. NVS-CECR2-1. <https://www.thesgc.org/chemical-probes/NVS-1> (2015).
4. Crawford, T.D. et al. GNE-886: A Potent and Selective Inhibitor of the Cat Eye Syndrome Chromosome Region Candidate 2 Bromodomain (CECR2). *ACS Med Chem Lett* **8**, 737-741 (2017).
5. Filippakopoulos, P. et al. Selective inhibition of BET bromodomains. *Nature* **468**, 1067-73 (2010).
6. Mirguet, O. et al. From ApoA1 upregulation to BET family bromodomain inhibition: discovery of I-BET151. *Bioorg Med Chem Lett* **22**, 2963-7 (2012).
7. Picaud, S. et al. PFI-1, a highly selective protein interaction inhibitor, targeting BET Bromodomains. *Cancer Res* **73**, 3336-46 (2013).
8. Hay, D.A. et al. Discovery and optimization of small-molecule ligands for the CBP/p300 bromodomains. *J Am Chem Soc* **136**, 9308-19 (2014).
9. Picaud, S. et al. Generation of a Selective Small Molecule Inhibitor of the CBP/p300 Bromodomain for Leukemia Therapy. *Cancer Res* **75**, 5106-5119 (2015).
10. Romero, F.A. et al. GNE-781, A Highly Advanced Potent and Selective Bromodomain Inhibitor of Cyclic Adenosine Monophosphate Response Element Binding Protein, Binding Protein (CBP). *J Med Chem* **60**, 9162-9183 (2017).
11. Meier, J.C. et al. Selective Targeting of Bromodomains of the Bromodomain-PHD Fingers Family Impairs Osteoclast Differentiation. *ACS Chem Biol* **12**, 2619-2630 (2017).
12. Bamborough, P. et al. GSK6853, a Chemical Probe for Inhibition of the BRPF1 Bromodomain. *ACS Med Chem Lett* **7**, 552-7 (2016).
13. Bouche, L. et al. Benzoisoquinolinediones as Potent and Selective Inhibitors of BRPF2 and TAF1/TAF1L Bromodomains. *J Med Chem* **60**, 4002-4022 (2017).
14. SGC. TP-472. <https://www.thesgc.org/chemical-probes/TP-472> (2016).
15. Martin, L.J. et al. Structure-Based Design of an in Vivo Active Selective BRD9 Inhibitor. *J Med Chem* **59**, 4462-75 (2016).
16. Clark, P.G. et al. LP99: Discovery and Synthesis of the First Selective BRD7/9 Bromodomain Inhibitor. *Angew Chem Int Ed Engl* **54**, 6217-21 (2015).
17. Theodoulou, N.H. et al. Discovery of I-BRD9, a Selective Cell Active Chemical Probe for Bromodomain Containing Protein 9 Inhibition. *J Med Chem* **59**, 1425-39 (2016).
18. Bamborough, P. et al. A Chemical Probe for the ATAD2 Bromodomain. *Angew Chem Int Ed Engl* **55**, 11382-6 (2016).
19. Bennett, J. et al. Discovery of a Chemical Tool Inhibitor Targeting the Bromodomains of TRIM24 and BRPF. *J Med Chem* **59**, 1642-7 (2016).
20. Fernandez-Montalvan, A.E. et al. Isoform-Selective ATAD2 Chemical Probe with Novel Chemical Structure and Unusual Mode of Action. *ACS Chem Biol* **12**, 2730-2736 (2017).
21. Drouin, L. et al. Structure enabled design of BAZ2-ICR, a chemical probe targeting the bromodomains of BAZ2A and BAZ2B. *J Med Chem* **58**, 2553-9 (2015).

22. Chen, P. et al. Discovery and Characterization of GSK2801, a Selective Chemical Probe for the Bromodomains BAZ2A and BAZ2B. *J Med Chem* **59**, 1410-24 (2016).
23. Fedorov, O. et al. Selective targeting of the BRG/PB1 bromodomains impairs embryonic and trophoblast stem cell maintenance. *Sci Adv* **1**, e1500723 (2015).

## Supplementary Table 2

| Compound    | TTK   | CK2A1 | CAMK1G | AAK1  | ABL1   | AURKB | BRAF  | CAMKK2  | STK10 |
|-------------|-------|-------|--------|-------|--------|-------|-------|---------|-------|
| L-Moses     | -0.5  | -0.1  | -0.3   | -1.6  | 0.0    | 0.4   | -0.1  | -0.1    | -0.4  |
| I-CBP112    | 0.0   | -1.9  | -0.2   | -0.7  | 0.0    | 0.3   | -0.1  | -0.4    | -0.4  |
| PFI-4       | -0.6  | -0.5  | -0.6   | -0.9  | 0.0    | 0.4   | 0.6   | 0.4     | -0.4  |
| LP-99       | -0.1  | -1.4  | -0.2   | -0.8  | -0.1   | 0.1   | -0.2  | 0.0     | -0.3  |
| PFI-3       | -0.7  | 0.3   | 0.0    | -0.3  | -0.1   | 0.2   | -0.1  | -0.1    | -0.2  |
| NVS-CECR2-1 | 0.4   | -1.0  | -0.4   | -0.7  | 0.0    | 0.3   | -0.1  | -0.3    | -0.1  |
| OF-1        | 0.1   | -2.4  | -0.7   | -0.9  | -0.1   | 0.3   | 0.0   | -0.3    | -0.2  |
| BAY-299     | -0.1  | -1.4  | -0.6   | -0.4  | 0.0    | 0.2   | 0.1   | -0.4    | -0.2  |
| I-BRD9      | 0.2   | -1.1  | -0.3   | -0.4  | 0.0    | 0.2   | 0.0   | -0.2    | -0.2  |
| JQ1         | -0.5  | -1.4  | -0.9   | -2.8  | -0.2   | -0.1  | -0.4  | -0.6    | -0.6  |
| GSK6853     | 0.1   | -0.7  | -0.5   | -0.8  | 0.1    | 1.0   | 0.1   | 0.5     | 0.1   |
| TP-472      | 0.2   | -1.1  | -0.2   | -0.3  | 0.1    | 0.2   | 0.8   | 0.0     | -0.2  |
| BAZ2-ICR    | 0.3   | -1.3  | -0.1   | 0.8   | 0.0    | 0.0   | 0.1   | 0.0     | 0.0   |
| SGC-CBP30   | -0.4  | -1.8  | -0.6   | -0.6  | -0.2   | 0.0   | -0.5  | -0.6    | 0.0   |
| NI-57       | 0.0   | -1.7  | -0.6   | 0.2   | -0.1   | 0.0   | 0.0   | -0.4    | 0.2   |
| BI-9564     | 0.1   | -1.2  | -0.6   | 0.1   | 0.0    | 0.1   | -0.2  | -0.2    | -0.2  |
| GSK2801     | 0.4   | -1.0  | -0.3   | 0.5   | 0.0    | -0.1  | -0.3  | 0.1     | -0.5  |
|             | EPHA2 | FES   | GPRK5  | GSG2  | MERTK  | PAK4  | MAPK1 | MAPK8   | STK3  |
| L-Moses     | 1.1   | -0.2  | -0.3   | 0.1   | 0.0    | -0.3  | 0.1   | 0.6     | 0.0   |
| I-CBP112    | 1.1   | -0.1  | -0.4   | 0.1   | -0.2   | -0.2  | 0.2   | 0.3     | 0.0   |
| PFI-4       | 1.8   | 0.0   | -0.3   | 0.3   | -0.1   | -0.2  | 0.2   | -0.2    | 0.0   |
| LP-99       | 0.9   | 0.0   | -0.3   | -0.2  | -0.2   | -0.4  | 0.2   | -0.1    | -0.2  |
| PFI-3       | -0.2  | -0.2  | -0.2   | 0.0   | -0.1   | -0.2  | -0.1  | 0.1     | -0.1  |
| NVS-CECR2-1 | 1.5   | -0.5  | -0.1   | 0.2   | 0.0    | -0.1  | 0.3   | -0.3    | -0.1  |
| OF-1        | 1.2   | -0.6  | -0.4   | 0.2   | -0.1   | -0.2  | 0.3   | -0.1    | 0.0   |
| BAY-299     | 2.0   | 0.0   | -0.3   | 0.1   | -0.2   | -0.1  | 0.0   | -0.4    | 0.1   |
| I-BRD9      | 1.2   | 0.1   | -0.1   | 0.1   | 0.0    | -0.1  | 0.1   | -0.1    | 0.1   |
| JQ1         | 0.9   | -0.8  | 0.1    | 0.1   | -0.3   | -0.4  | 0.2   | -0.8    | 0.1   |
| GSK6853     | 1.5   | -0.2  | -0.3   | 0.6   | 0.3    | 0.1   | 0.2   | 0.1     | 0.3   |
| TP-472      | 2.1   | 0.0   | -0.1   | 0.1   | -0.1   | 0.0   | 0.2   | 0.2     | 0.1   |
| BAZ2-ICR    | 1.1   | 0.0   | 0.0    | 0.0   | 0.0    | 0.0   | 0.1   | 0.2     | 0.0   |
| SGC-CBP30   | 1.2   | -0.6  | 0.1    | 0.0   | -0.1   | 0.0   | 0.2   | 0.8     | 0.0   |
| NI-57       | 1.5   | -0.4  | -0.3   | 0.0   | 0.0    | 0.1   | 0.1   | 0.1     | 0.2   |
| BI-9564     | 2.1   | -0.1  | -0.4   | 0.0   | 0.2    | 0.0   | 0.1   | 0.0     | 0.0   |
| GSK2801     | 1.2   | -0.2  | -0.5   | 0.2   | 0.0    | -0.2  | 0.2   | 0.1     | 0.1   |
|             | CASK  | BMX   | CSNK1D | DAPK3 | DYRK1A | PHGK2 | PIM1  | RPS6KA1 |       |
| L-Moses     | -0.1  | -0.1  | 0.6    | 0.2   | 0.2    | -0.1  | 2.3   | 0.2     |       |
| I-CBP112    | 0.0   | -0.1  | 0.5    | 0.0   | -0.4   | 0.1   | -0.1  | 0.1     |       |
| PFI-4       | -0.2  | 0.6   | 1.3    | 0.4   | -0.5   | 0.1   | 0.5   | 0.1     |       |
| LP-99       | -0.3  | 0.2   | 0.2    | -0.1  | -0.3   | -0.1  | -0.2  | -0.1    |       |
| PFI-3       | -0.2  | 0.3   | 0.3    | 0.0   | -0.1   | 0.1   | 0.1   | -0.2    |       |
| NVS-CECR2-1 | 0.1   | 0.0   | 0.4    | 0.7   | -0.3   | -0.2  | 0.4   | 0.2     |       |
| OF-1        | 0.0   | 0.5   | 0.6    | -0.1  | -0.8   | 0.1   | -0.2  | 0.0     |       |
| BAY-299     | -0.1  | 0.3   | 1.2    | -0.2  | -0.5   | 0.0   | -0.2  | 0.1     |       |
| I-BRD9      | -0.2  | 0.3   | 0.0    | -0.2  | -0.6   | 0.0   | 0.1   | 0.1     |       |
| JQ1         | 0.1   | -0.3  | 0.4    | -0.1  | 0.2    | -0.3  | -0.3  | -0.1    |       |

|           |      |      |     |      |      |      |      |      |
|-----------|------|------|-----|------|------|------|------|------|
| GSK6853   | 0.1  | 0.3  | 1.3 | 1.1  | -0.2 | 0.2  | 3.7  | 0.2  |
| TP-472    | -0.1 | 0.5  | 1.1 | 0.0  | -0.3 | 0.1  | 0.4  | 0.1  |
| BAZ2-ICR  | 0.2  | 0.5  | 0.4 | -0.1 | -0.1 | -0.1 | 0.2  | 0.1  |
| SGC-CBP30 | 0.5  | -0.2 | 0.3 | 0.2  | -0.2 | -0.3 | -0.2 | 0.0  |
| NI-57     | 0.3  | 0.0  | 0.6 | 0.0  | 0.1  | 0.1  | 0.1  | 0.2  |
| BI-9564   | 0.0  | 0.1  | 1.1 | 0.1  | 0.1  | -0.1 | 0.0  | 0.1  |
| GSK2801   | 0.5  | 0.2  | 0.2 | -0.2 | 0.4  | -0.2 | -0.3 | -0.1 |

**Supplementary table 2: Selectivity screening data (protein kinases):** Temperature shift data measured on protein kinases. Shown are average data in Kelvin of three measurements. No significant T<sub>m</sub> shifts have been observed.

**Supplementary Table 3**

| Probes      | $\Delta T_m$ ( $^{\circ}\text{C}$ ) 10 $\mu\text{M}$ |       |       |       |       |      |      |       |      |      |
|-------------|------------------------------------------------------|-------|-------|-------|-------|------|------|-------|------|------|
|             | UHRF1                                                | RBBP1 | 53BP1 | BRPF1 | BRPF3 | WDR5 | EED  | TDRD3 | FXR1 | SND1 |
| BAY-299     | NA                                                   | -1.0  | 0.3   | -2.5  | 1.5   | 0.2  | NA   | -1.4  | 0.8  | NA   |
| BAY-588     | -0.4                                                 | -0.1  | -2.3  | -0.2  | NA    | -7.3 | -0.5 | -5.3  | -1.2 | -1.0 |
| BAY-850     | -0.3                                                 | -1.0  | -0.7  | -2.2  | -0.4  | 0.2  | NA   | -1.8  | -1.7 | -1.6 |
| BAY-876     | -0.2                                                 | -0.3  | 0.0   | -0.3  | -0.3  | 0.4  | -0.7 | -1.0  | 0.8  | -0.9 |
| BI-9564     | -0.2                                                 | 0.0   | -0.3  | -0.3  | -0.6  | -0.2 | -0.7 | -0.6  | 0.3  | -0.9 |
| GSK4027     | -0.2                                                 | -0.7  | -0.1  | -0.8  | -0.3  | 0.2  | -0.7 | -0.6  | 0.3  | -1.0 |
| GSK6853     | -0.2                                                 | -0.7  | -0.1  | -0.9  | -0.4  | 0.0  | -0.9 | -0.7  | -1.1 | -0.6 |
| GSK8814     | -0.2                                                 | -0.1  | -0.1  | -0.2  | -0.2  | 0.2  | -0.4 | -0.6  | 0.4  | -0.5 |
| I-BRD9      | -0.1                                                 | 0.0   | 0.1   | 0.2   | 0.1   | 0.1  | -0.7 | -0.4  | 0.1  | -0.3 |
| I-CBP112    | 0.0                                                  | -0.1  | 0.3   | -0.2  | 0.0   | -0.2 | -0.5 | -0.6  | 0.9  | -0.7 |
| JQ1         | -0.2                                                 | -0.7  | -0.4  | -0.6  | -0.7  | -0.3 | -0.9 | -1.4  | -0.5 | -0.6 |
| L-Moses     | NA                                                   | -0.4  | NA    | -2.7  | 1.0   | 0.5  | -0.3 | -0.9  | 0.3  | -1.0 |
| LP99        | NA                                                   | -0.7  | 0.3   | -2.0  | 0.0   | 0.4  | -0.2 | -0.5  | 0.1  | -0.4 |
| NI57        | NA                                                   | -0.1  | -0.1  | NA    | -0.4  | 0.3  | -0.4 | -0.7  | -0.5 | -0.4 |
| NVS-CECR2-1 | -0.3                                                 | -1.0  | -0.6  | -0.2  | -0.3  | -0.2 | -1.0 | -3.3  | -5.1 | -1.7 |
| OF-1        | 0.2                                                  | -0.7  | -0.1  | -0.6  | 0.0   | -0.2 | -0.7 | -1.0  | 0.7  | -0.7 |
| PFI-1       | 0.2                                                  | -0.6  | -0.2  | -0.3  | -0.2  | 0.0  | -0.9 | -1.7  | -0.1 | -0.7 |
| PFI-3       | 0.5                                                  | -0.7  | 0.1   | -0.5  | 0.4   | 0.2  | -0.9 | -0.6  | 0.4  | -0.6 |
| PFI-4       | -0.5                                                 | -1.2  | -0.7  | -0.7  | 0.0   | -0.5 | -2.2 | -1.5  | -1.2 | -1.1 |
| SGC-CBP30   | 0.0                                                  | -1.2  | -0.2  | 0.6   | 0.2   | 0.2  | -0.4 | -1.1  | -1.2 | -0.4 |
| TP-238      | 0.0                                                  | -0.4  | 0.4   | -0.3  | 0.2   | 0.2  | -0.3 | -0.7  | 0.4  | -0.5 |
| TP-472      | -0.1                                                 | -0.5  | 0.1   | 0.2   | 0.3   | 0.0  | -0.5 | -0.1  | 0.8  | -0.5 |

**Supplementary Table 3: Selectivity screening data (non-BRD reader domains):** Temperature shift assay data of BRD probes screened against a diverse panel of methyl-lysine reader domains. Compounds were screened a concentration of 10  $\mu\text{M}$ . Shown are temperature shifts in Kelvin. No significant  $T_m$  shifts have been observed.

**Supplementary Table 4**

| Probes             | HATs Activity (%) at 1 and 10 $\mu$ M |            |           |            |           |            |           |            |           |            |
|--------------------|---------------------------------------|------------|-----------|------------|-----------|------------|-----------|------------|-----------|------------|
|                    | EP300                                 |            | HAT1      |            | MYST1     |            | MYST3     |            | GCN5L2    |            |
|                    | 1 $\mu$ M                             | 10 $\mu$ M | 1 $\mu$ M | 10 $\mu$ M | 1 $\mu$ M | 10 $\mu$ M | 1 $\mu$ M | 10 $\mu$ M | 1 $\mu$ M | 10 $\mu$ M |
| <b>BAY-299</b>     | 95                                    | 93         | 100       | 93         | 99        | 99         | 98        | 85         | 99        | 103        |
| <b>BAY-588</b>     | 103                                   | 99         | 99        | 97         | 100       | 93         | 99        | 96         | 94        | 95         |
| <b>BAY-850</b>     | 98                                    | 87         | 101       | 101        | 93        | 94         | 96        | 97         | 99        | 102        |
| <b>BAY-876</b>     | 99                                    | 95         | 97        | 89         | 96        | 91         | 99        | 101        | 100       | 97         |
| <b>BI-9564</b>     | 99                                    | 94         | 99        | 96         | 106       | 101        | 99        | 100        | 102       | 100        |
| <b>GSK4027</b>     | 93                                    | 90         | 102       | 89         | 102       | 98         | 101       | 101        | 99        | 102        |
| <b>GSK6853</b>     | 98                                    | 104        | 100       | 94         | 99        | 101        | 107       | 104        | 107       | 107        |
| <b>GSK8814</b>     | 96                                    | 102        | 100       | 95         | 99        | 103        | 96        | 102        | 102       | 100        |
| <b>I-BRD9</b>      | 96                                    | 99         | 103       | 101        | 104       | 104        | 101       | 99         | 104       | 102        |
| <b>I-CBP112</b>    | 97                                    | 99         | 100       | 94         | 98        | 103        | 98        | 99         | 105       | 102        |
| <b>JQ1</b>         | 99                                    | 102        | 98        | 103        | 99        | 95         | 108       | 100        | 104       | 98         |
| <b>L-Moses</b>     | 94                                    | 90         | 100       | 95         | 97        | 96         | 92        | 90         | 99        | 95         |
| <b>LP99</b>        | 99                                    | 98         | 104       | 95         | 90        | 88         | 96        | 100        | 92        | 89         |
| <b>NI57</b>        | 94                                    | 93         | 104       | 104        | 96        | 91         | 98        | 99         | 100       | 96         |
| <b>NVS-CECR2-1</b> | 90                                    | 84         | 99        | 88         | 96        | 94         | 98        | 103        | 100       | 100        |
| <b>OF-1</b>        | 100                                   | 103        | 92        | 93         | 102       | 94         | 100       | 102        | 98        | 93         |
| <b>PFI-1</b>       | 99                                    | 100        | 102       | 93         | 101       | 95         | 105       | 86         | 96        | 93         |
| <b>PFI-3</b>       | 98                                    | 97         | 96        | 94         | 99        | 99         | 95        | 96         | 99        | 101        |
| <b>PFI-4</b>       | 99                                    | 101        | 98        | 96         | 98        | 101        | 97        | 102        | 98        | 96         |
| <b>SGC-CBP30</b>   | 98                                    | 92         | 96        | 97         | 103       | 97         | 103       | 103        | 101       | 101        |
| <b>TP-238</b>      | 99                                    | 95         | 93        | 100        | 99        | 97         | 97        | 99         | 96        | 92         |
| <b>TP-472</b>      | 95                                    | 96         | 98        | 97         | 100       | 103        | 99        | 98         | 94        | 92         |

**Supplementary Table 4: Selectivity screening data (HATs):** Effects of BRD probe compounds on the activity of histone acetyltransferases (HATs). Shown are inhibition data (% inhibition) at a compound concentration of 1  $\mu$ M and 10  $\mu$ M.

Supplementary Table 5

| MTases            | MTases Inhibition (%) at 10 $\mu$ M |         |         |         |         |         |         |        |
|-------------------|-------------------------------------|---------|---------|---------|---------|---------|---------|--------|
|                   | BAY-588                             | BAY-850 | BAY-876 | GSK4027 | GSK6853 | GSK8814 | L-Moses | TP-238 |
| ASH1L             | -6                                  | 3       | 4       | 13      | 4       | 2       | -3      | -4     |
| G9A               | 3                                   | 7       | -3      | 1       | -2      | -2      | -3      | 7      |
| GLP               | 2                                   | 2       | 0       | 2       | 3       | 2       | 2       | 1      |
| MLL1 (Trimeric)   | 7                                   | -1      | 11      | 8       | 7       | 6       | 20      | 17     |
| MLL3 (pentameric) | 7                                   | 0       | 0       | 2       | 2       | 0       | 1       | -3     |
| NSD2              | 2                                   | -1      | 0       | 15      | 13      | 24      | 2       | 3      |
| NSD1              | 11                                  | 2       | 2       | 4       | 1       | 19      | -6      | 1      |
| NSD3              | -2                                  | 14      | 3       | 10      | 7       | 13      | 5       | 15     |
| PRC2-EZH1         | 3                                   | 19      | -4      | -1      | 1       | 1       | 5       | 6      |
| PRC2-EZH2         | 3                                   | 3       | 5       | -5      | 0       | 2       | -4      | 3      |
| PRDM9             | 3                                   | 10      | 0       | 3       | -2      | 0       | 4       | -1     |
| SETD2             | 0                                   | 7       | -4      | -1      | 1       | 7       | 11      | 19     |
| SETD7             | 10                                  | 11      | 10      | 12      | 7       | 7       | 7       | -1     |
| SETD8             | -3                                  | 2       | 0       | 10      | -6      | -7      | -8      | -6     |
| SETDB1            | 5                                   | 8       | -4      | -1      | 1       | 1       | 1       | -1     |
| SMYD2             | 8                                   | 19      | -10     | 2       | -3      | -2      | -10     | -2     |
| SMYD3             | 7                                   | 6       | 3       | 1       | 9       | 8       | 10      | 7      |
| SUV39H1           | 12                                  | 5       | 16      | -3      | -3      | -2      | -2      | -1     |
| SUV39H2           | 12                                  | -2      | -2      | 5       | 1       | 3       | 5       | 7      |
| SUV420H1          | -5                                  | 5       | -1      | 8       | 5       | -3      | 4       | 3      |
| SUV420H2          | -3                                  | 0       | -1      | -1      | -2      | 0       | 6       | 0      |
| DOT1L             | 3                                   | 3       | -6      | -2      | 10      | 5       | 1       | 6      |
| PRMT1             | 0                                   | 15      | 2       | 4       | -7      | 3       | -2      | 0      |
| PRMT3             | 5                                   | 3       | 1       | 2       | 1       | 3       | 0       | 5      |
| PRMT4             | 9                                   | 25      | 1       | -2      | 2       | 1       | 6       | 3      |
| PRMT5             | 4                                   | 4       | -1      | 8       | 3       | -2      | -3      | -12    |
| PRMT6             | 4                                   | 13      | -3      | 6       | 5       | 0       | 5       | 6      |
| PRMT7             | 13                                  | 3       | 12      | 15      | 11      | 11      | 8       | 9      |
| PRMT8             | 3                                   | 4       | 9       | 15      | 3       | 5       | 5       | 3      |
| PRMT9             | 3                                   | 15      | 12      | 8       | 12      | 3       | 13      | 7      |
| BCDIN3D           | 16                                  | 28      | 17      | 14      | 5       | 7       | 9       | 4      |
| DNMT1             | 9                                   | 4       | 4       | 3       | -8      | -3      | 3       | 3      |
| DNMT3A/3L         | -1                                  | 21      | 6       | 3       | 13      | 8       | 2       | 8      |
| DNMT3B/3L         | -6                                  | 28      | 1       | 1       | 8       | 18      | -1      | 0      |

**Supplementary table 5:** Selectivity screening data measured against a panel of lysine methyl transferases (MTases). Inhibition (%) was assessed at inhibitor concentration of 10  $\mu$ M. Shown are average values of two measurements.



### Supplementary Figure 4

Figure 6F-full gel

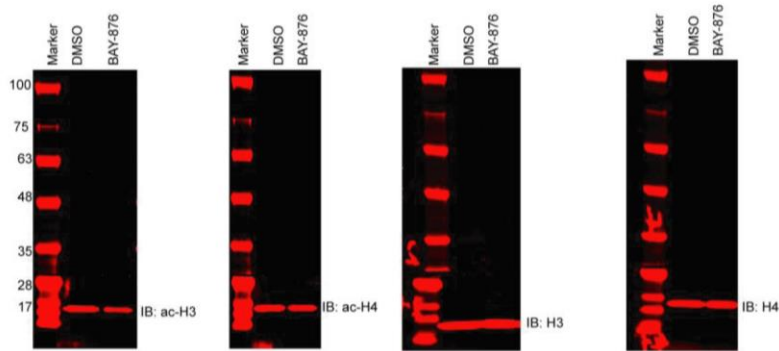

Figure 7D-full gel

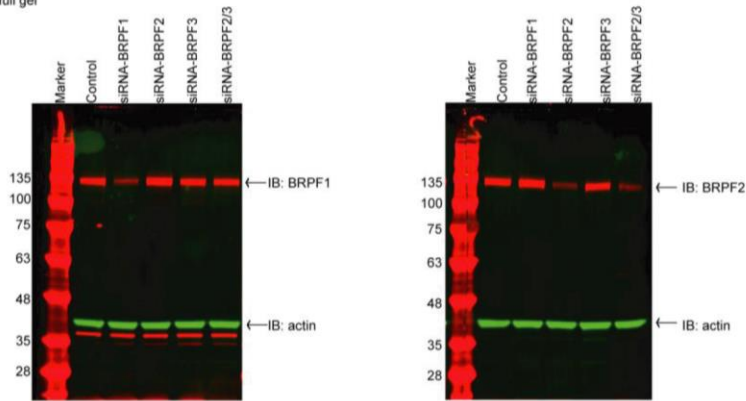

Figure 7G-full gel

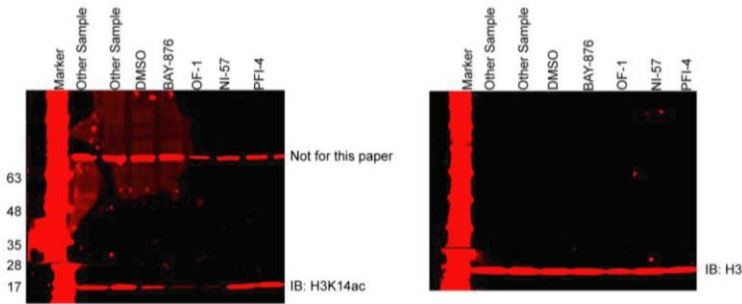

Figure 7H-full gel

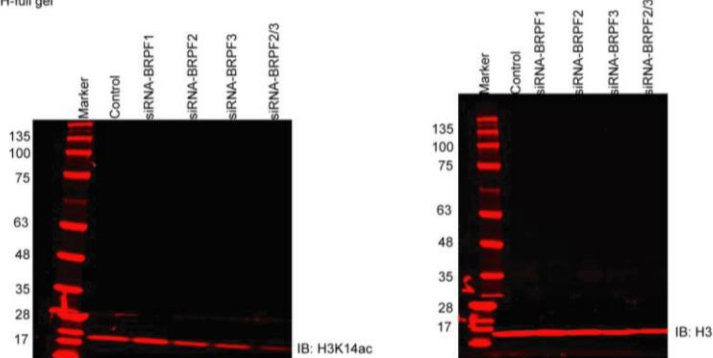

Supplementary Figure 4: Raw data blots used in figure 6 and 7.
