# Supplementary material for: A chemical toolbox for the study of bromodomains and epigenetic signaling
Source: Nat Commun. 2019 Apr 23;10:1915. doi: 10.1038/s41467-019-09672-2 (PMC6478789; doi:10.1038/s41467-019-09672-2)
Supplement: Supplementary file 4 — Supplementary Data 1 [file 41467_2019_9672_MOESM4_ESM.xlsx]

## Sheet: Sheet1
BROMOscan Gene Symbol	Common Inhibitor Name	CBIS Compound Name	KD	St.Dev.	n	KD Units	Inhibitor SMILE
ATAD2A	BAZ2-ICR	BDILV000379a	>50000		2	nM	Cn1cc(CCn2cnc(c3cnn(C)c3)c2c2ccc(C#N)cc2)cn1
ATAD2B	BAZ2-ICR	BDILV000379a	>50000		2	nM	Cn1cc(CCn2cnc(c3cnn(C)c3)c2c2ccc(C#N)cc2)cn1
BAZ1B	BAZ2-ICR	BDILV000379a	>50000		2	nM	Cn1cc(CCn2cnc(c3cnn(C)c3)c2c2ccc(C#N)cc2)cn1
BAZ2A	BAZ2-ICR	BDILV000379a	>50000		4	nM	Cn1cc(CCn2cnc(c3cnn(C)c3)c2c2ccc(C#N)cc2)cn1
BAZ2B	BAZ2-ICR	BDILV000379a	7.6	0.35	2	nM	Cn1cc(CCn2cnc(c3cnn(C)c3)c2c2ccc(C#N)cc2)cn1
BRD1	BAZ2-ICR	BDILV000379a	21000	1400	2	nM	Cn1cc(CCn2cnc(c3cnn(C)c3)c2c2ccc(C#N)cc2)cn1
BRD2(1)	BAZ2-ICR	BDILV000379a	>50000		2	nM	Cn1cc(CCn2cnc(c3cnn(C)c3)c2c2ccc(C#N)cc2)cn1
BRD2(1,2)	BAZ2-ICR	BDILV000379a	45000	5700	2	nM	Cn1cc(CCn2cnc(c3cnn(C)c3)c2c2ccc(C#N)cc2)cn1
BRD2(2)	BAZ2-ICR	BDILV000379a	>50000		2	nM	Cn1cc(CCn2cnc(c3cnn(C)c3)c2c2ccc(C#N)cc2)cn1
BRD3(1)	BAZ2-ICR	BDILV000379a	40000	2100	2	nM	Cn1cc(CCn2cnc(c3cnn(C)c3)c2c2ccc(C#N)cc2)cn1
BRD3(1,2)	BAZ2-ICR	BDILV000379a	>50000		2	nM	Cn1cc(CCn2cnc(c3cnn(C)c3)c2c2ccc(C#N)cc2)cn1
BRD3(2)	BAZ2-ICR	BDILV000379a	>50000		2	nM	Cn1cc(CCn2cnc(c3cnn(C)c3)c2c2ccc(C#N)cc2)cn1
BRD4(1)	BAZ2-ICR	BDILV000379a	>50000		2	nM	Cn1cc(CCn2cnc(c3cnn(C)c3)c2c2ccc(C#N)cc2)cn1
BRD4(1,2)	BAZ2-ICR	BDILV000379a	>50000		2	nM	Cn1cc(CCn2cnc(c3cnn(C)c3)c2c2ccc(C#N)cc2)cn1
BRD4(2)	BAZ2-ICR	BDILV000379a	>50000		2	nM	Cn1cc(CCn2cnc(c3cnn(C)c3)c2c2ccc(C#N)cc2)cn1
BRD4(full-length,short-iso.)	BAZ2-ICR	BDILV000379a	>50000		2	nM	Cn1cc(CCn2cnc(c3cnn(C)c3)c2c2ccc(C#N)cc2)cn1
BRD7	BAZ2-ICR	BDILV000379a	>50000		2	nM	Cn1cc(CCn2cnc(c3cnn(C)c3)c2c2ccc(C#N)cc2)cn1
BRD8(1)	BAZ2-ICR	BDILV000379a	>50000		2	nM	Cn1cc(CCn2cnc(c3cnn(C)c3)c2c2ccc(C#N)cc2)cn1
BRD8(2)	BAZ2-ICR	BDILV000379a	>50000		2	nM	Cn1cc(CCn2cnc(c3cnn(C)c3)c2c2ccc(C#N)cc2)cn1
BRD9	BAZ2-ICR	BDILV000379a	>50000		2	nM	Cn1cc(CCn2cnc(c3cnn(C)c3)c2c2ccc(C#N)cc2)cn1
BRDT(1)	BAZ2-ICR	BDILV000379a	>50000		2	nM	Cn1cc(CCn2cnc(c3cnn(C)c3)c2c2ccc(C#N)cc2)cn1
BRDT(1,2)	BAZ2-ICR	BDILV000379a	>50000		2	nM	Cn1cc(CCn2cnc(c3cnn(C)c3)c2c2ccc(C#N)cc2)cn1
BRDT(2)	BAZ2-ICR	BDILV000379a	>50000		2	nM	Cn1cc(CCn2cnc(c3cnn(C)c3)c2c2ccc(C#N)cc2)cn1
BRPF1	BAZ2-ICR	BDILV000379a	>50000		2	nM	Cn1cc(CCn2cnc(c3cnn(C)c3)c2c2ccc(C#N)cc2)cn1
BRPF3	BAZ2-ICR	BDILV000379a	>50000		2	nM	Cn1cc(CCn2cnc(c3cnn(C)c3)c2c2ccc(C#N)cc2)cn1
CECR2	BAZ2-ICR	BDILV000379a	1000	130	2	nM	Cn1cc(CCn2cnc(c3cnn(C)c3)c2c2ccc(C#N)cc2)cn1
CREBBP	BAZ2-ICR	BDILV000379a	21000	710	2	nM	Cn1cc(CCn2cnc(c3cnn(C)c3)c2c2ccc(C#N)cc2)cn1
EP300	BAZ2-ICR	BDILV000379a	41000	3500	2	nM	Cn1cc(CCn2cnc(c3cnn(C)c3)c2c2ccc(C#N)cc2)cn1
FALZ	BAZ2-ICR	BDILV000379a	44000	710	2	nM	Cn1cc(CCn2cnc(c3cnn(C)c3)c2c2ccc(C#N)cc2)cn1
GCN5L2	BAZ2-ICR	BDILV000379a	>50000		2	nM	Cn1cc(CCn2cnc(c3cnn(C)c3)c2c2ccc(C#N)cc2)cn1
PBRM1(2)	BAZ2-ICR	BDILV000379a	>50000		2	nM	Cn1cc(CCn2cnc(c3cnn(C)c3)c2c2ccc(C#N)cc2)cn1
PBRM1(5)	BAZ2-ICR	BDILV000379a	>50000		2	nM	Cn1cc(CCn2cnc(c3cnn(C)c3)c2c2ccc(C#N)cc2)cn1
PCAF	BAZ2-ICR	BDILV000379a	15000	1400	2	nM	Cn1cc(CCn2cnc(c3cnn(C)c3)c2c2ccc(C#N)cc2)cn1
SMARCA2	BAZ2-ICR	BDILV000379a	>50000		2	nM	Cn1cc(CCn2cnc(c3cnn(C)c3)c2c2ccc(C#N)cc2)cn1
SMARCA2(iso.A)	BAZ2-ICR	BDILV000379a	>50000		2	nM	Cn1cc(CCn2cnc(c3cnn(C)c3)c2c2ccc(C#N)cc2)cn1
SMARCA4	BAZ2-ICR	BDILV000379a	>50000		2	nM	Cn1cc(CCn2cnc(c3cnn(C)c3)c2c2ccc(C#N)cc2)cn1
TAF1(2)	BAZ2-ICR	BDILV000379a	>50000		2	nM	Cn1cc(CCn2cnc(c3cnn(C)c3)c2c2ccc(C#N)cc2)cn1
TAF1L(2)	BAZ2-ICR	BDILV000379a	>50000		2	nM	Cn1cc(CCn2cnc(c3cnn(C)c3)c2c2ccc(C#N)cc2)cn1
TRIM24(Bromo.)	BAZ2-ICR	BDILV000379a	>50000		2	nM	Cn1cc(CCn2cnc(c3cnn(C)c3)c2c2ccc(C#N)cc2)cn1
TRIM24(PHD,Bromo.)	BAZ2-ICR	BDILV000379a	>50000		2	nM	Cn1cc(CCn2cnc(c3cnn(C)c3)c2c2ccc(C#N)cc2)cn1
TRIM33(PHD,Bromo.)	BAZ2-ICR	BDILV000379a	>50000		2	nM	Cn1cc(CCn2cnc(c3cnn(C)c3)c2c2ccc(C#N)cc2)cn1
WDR9(2)	BAZ2-ICR	BDILV000379a	>50000		2	nM	Cn1cc(CCn2cnc(c3cnn(C)c3)c2c2ccc(C#N)cc2)cn1
ATAD2A	CBP30-298	BDOIA298	>150000		2	nM	Cc1c(c2ccc3c(c2)nc(CCc2ccccc2)n3CCN2CCOCC2)c(C)on1
ATAD2B	CBP30-298	BDOIA298	>50000		2	nM	Cc1c(c2ccc3c(c2)nc(CCc2ccccc2)n3CCN2CCOCC2)c(C)on1
BAZ1B	CBP30-298	BDOIA298	nd				Cc1c(c2ccc3c(c2)nc(CCc2ccccc2)n3CCN2CCOCC2)c(C)on1
BAZ2A	CBP30-298	BDOIA298	55000	9900	2	nM	Cc1c(c2ccc3c(c2)nc(CCc2ccccc2)n3CCN2CCOCC2)c(C)on1
BAZ2B	CBP30-298	BDOIA298	>50000		2	nM	Cc1c(c2ccc3c(c2)nc(CCc2ccccc2)n3CCN2CCOCC2)c(C)on1
BRD1	CBP30-298	BDOIA298	46000	4400	2	nM	Cc1c(c2ccc3c(c2)nc(CCc2ccccc2)n3CCN2CCOCC2)c(C)on1
BRD2(1)	CBP30-298	BDOIA298	780	100	2	nM	Cc1c(c2ccc3c(c2)nc(CCc2ccccc2)n3CCN2CCOCC2)c(C)on1
BRD2(1,2)	CBP30-298	BDOIA298	nd				Cc1c(c2ccc3c(c2)nc(CCc2ccccc2)n3CCN2CCOCC2)c(C)on1
BRD2(2)	CBP30-298	BDOIA298	1800	190	2	nM	Cc1c(c2ccc3c(c2)nc(CCc2ccccc2)n3CCN2CCOCC2)c(C)on1
BRD3(1)	CBP30-298	BDOIA298	960	41	2	nM	Cc1c(c2ccc3c(c2)nc(CCc2ccccc2)n3CCN2CCOCC2)c(C)on1
BRD3(1,2)	CBP30-298	BDOIA298	nd				Cc1c(c2ccc3c(c2)nc(CCc2ccccc2)n3CCN2CCOCC2)c(C)on1
BRD3(2)	CBP30-298	BDOIA298	1600	220	2	nM	Cc1c(c2ccc3c(c2)nc(CCc2ccccc2)n3CCN2CCOCC2)c(C)on1
BRD4(1)	CBP30-298	BDOIA298	520	11	2	nM	Cc1c(c2ccc3c(c2)nc(CCc2ccccc2)n3CCN2CCOCC2)c(C)on1
BRD4(1,2)	CBP30-298	BDOIA298	nd				Cc1c(c2ccc3c(c2)nc(CCc2ccccc2)n3CCN2CCOCC2)c(C)on1
BRD4(2)	CBP30-298	BDOIA298	2700	290	2	nM	Cc1c(c2ccc3c(c2)nc(CCc2ccccc2)n3CCN2CCOCC2)c(C)on1
BRD4(full-length,short-iso.)	CBP30-298	BDOIA298	nd				Cc1c(c2ccc3c(c2)nc(CCc2ccccc2)n3CCN2CCOCC2)c(C)on1
BRD7	CBP30-298	BDOIA298	nd				Cc1c(c2ccc3c(c2)nc(CCc2ccccc2)n3CCN2CCOCC2)c(C)on1
BRD8(1)	CBP30-298	BDOIA298	nd				Cc1c(c2ccc3c(c2)nc(CCc2ccccc2)n3CCN2CCOCC2)c(C)on1
BRD8(2)	CBP30-298	BDOIA298	nd				Cc1c(c2ccc3c(c2)nc(CCc2ccccc2)n3CCN2CCOCC2)c(C)on1
BRD9	CBP30-298	BDOIA298	12000	210	2	nM	Cc1c(c2ccc3c(c2)nc(CCc2ccccc2)n3CCN2CCOCC2)c(C)on1
BRDT(1)	CBP30-298	BDOIA298	1800	170	2	nM	Cc1c(c2ccc3c(c2)nc(CCc2ccccc2)n3CCN2CCOCC2)c(C)on1
BRDT(1,2)	CBP30-298	BDOIA298	nd				Cc1c(c2ccc3c(c2)nc(CCc2ccccc2)n3CCN2CCOCC2)c(C)on1
BRDT(2)	CBP30-298	BDOIA298	6800	740	2	nM	Cc1c(c2ccc3c(c2)nc(CCc2ccccc2)n3CCN2CCOCC2)c(C)on1
BRPF1	CBP30-298	BDOIA298	18000	2800	2	nM	Cc1c(c2ccc3c(c2)nc(CCc2ccccc2)n3CCN2CCOCC2)c(C)on1
BRPF3	CBP30-298	BDOIA298	>50000		2	nM	Cc1c(c2ccc3c(c2)nc(CCc2ccccc2)n3CCN2CCOCC2)c(C)on1
CECR2	CBP30-298	BDOIA298	nd				Cc1c(c2ccc3c(c2)nc(CCc2ccccc2)n3CCN2CCOCC2)c(C)on1
CREBBP	CBP30-298	BDOIA298	140	16	2	nM	Cc1c(c2ccc3c(c2)nc(CCc2ccccc2)n3CCN2CCOCC2)c(C)on1
EP300	CBP30-298	BDOIA298	92	8.5	2	nM	Cc1c(c2ccc3c(c2)nc(CCc2ccccc2)n3CCN2CCOCC2)c(C)on1
FALZ	CBP30-298	BDOIA298	>50000		2	nM	Cc1c(c2ccc3c(c2)nc(CCc2ccccc2)n3CCN2CCOCC2)c(C)on1
GCN5L2	CBP30-298	BDOIA298	nd				Cc1c(c2ccc3c(c2)nc(CCc2ccccc2)n3CCN2CCOCC2)c(C)on1
PBRM1(2)	CBP30-298	BDOIA298	42000	1200	2	nM	Cc1c(c2ccc3c(c2)nc(CCc2ccccc2)n3CCN2CCOCC2)c(C)on1
PBRM1(5)	CBP30-298	BDOIA298	nd				Cc1c(c2ccc3c(c2)nc(CCc2ccccc2)n3CCN2CCOCC2)c(C)on1
PCAF	CBP30-298	BDOIA298	nd				Cc1c(c2ccc3c(c2)nc(CCc2ccccc2)n3CCN2CCOCC2)c(C)on1
SMARCA2	CBP30-298	BDOIA298	nd				Cc1c(c2ccc3c(c2)nc(CCc2ccccc2)n3CCN2CCOCC2)c(C)on1
SMARCA2(iso.A)	CBP30-298	BDOIA298	nd				Cc1c(c2ccc3c(c2)nc(CCc2ccccc2)n3CCN2CCOCC2)c(C)on1
SMARCA4	CBP30-298	BDOIA298	nd				Cc1c(c2ccc3c(c2)nc(CCc2ccccc2)n3CCN2CCOCC2)c(C)on1
TAF1(2)	CBP30-298	BDOIA298	5800	920	2	nM	Cc1c(c2ccc3c(c2)nc(CCc2ccccc2)n3CCN2CCOCC2)c(C)on1
TAF1L(2)	CBP30-298	BDOIA298	17000	3800	2	nM	Cc1c(c2ccc3c(c2)nc(CCc2ccccc2)n3CCN2CCOCC2)c(C)on1
TRIM24(Bromo.)	CBP30-298	BDOIA298	nd				Cc1c(c2ccc3c(c2)nc(CCc2ccccc2)n3CCN2CCOCC2)c(C)on1
TRIM24(PHD,Bromo.)	CBP30-298	BDOIA298	17000	7300	2	nM	Cc1c(c2ccc3c(c2)nc(CCc2ccccc2)n3CCN2CCOCC2)c(C)on1
TRIM33(PHD,Bromo.)	CBP30-298	BDOIA298	>50000		2	nM	Cc1c(c2ccc3c(c2)nc(CCc2ccccc2)n3CCN2CCOCC2)c(C)on1
WDR9(2)	CBP30-298	BDOIA298	30000	9100	2	nM	Cc1c(c2ccc3c(c2)nc(CCc2ccccc2)n3CCN2CCOCC2)c(C)on1
ATAD2A	CBP30-383	BDOIA383	>150000		2	nM	Cc1c(c2ccc3c(c2)nc(CCc2ccc(cc2)OC)n3CCN2CCOCC2)c(C)on1
ATAD2B	CBP30-383	BDOIA383	>50000		2	nM	Cc1c(c2ccc3c(c2)nc(CCc2ccc(cc2)OC)n3CCN2CCOCC2)c(C)on1
BAZ1B	CBP30-383	BDOIA383	nd				Cc1c(c2ccc3c(c2)nc(CCc2ccc(cc2)OC)n3CCN2CCOCC2)c(C)on1
BAZ2A	CBP30-383	BDOIA383	75000	6400	2	nM	Cc1c(c2ccc3c(c2)nc(CCc2ccc(cc2)OC)n3CCN2CCOCC2)c(C)on1
BAZ2B	CBP30-383	BDOIA383	>50000		2	nM	Cc1c(c2ccc3c(c2)nc(CCc2ccc(cc2)OC)n3CCN2CCOCC2)c(C)on1
BRD1	CBP30-383	BDOIA383	47000	2800	2	nM	Cc1c(c2ccc3c(c2)nc(CCc2ccc(cc2)OC)n3CCN2CCOCC2)c(C)on1
BRD2(1)	CBP30-383	BDOIA383	1500	15	2	nM	Cc1c(c2ccc3c(c2)nc(CCc2ccc(cc2)OC)n3CCN2CCOCC2)c(C)on1
BRD2(1,2)	CBP30-383	BDOIA383	nd				Cc1c(c2ccc3c(c2)nc(CCc2ccc(cc2)OC)n3CCN2CCOCC2)c(C)on1
BRD2(2)	CBP30-383	BDOIA383	3600	630	2	nM	Cc1c(c2ccc3c(c2)nc(CCc2ccc(cc2)OC)n3CCN2CCOCC2)c(C)on1
BRD3(1)	CBP30-383	BDOIA383	1400	230	2	nM	Cc1c(c2ccc3c(c2)nc(CCc2ccc(cc2)OC)n3CCN2CCOCC2)c(C)on1
BRD3(1,2)	CBP30-383	BDOIA383	nd				Cc1c(c2ccc3c(c2)nc(CCc2ccc(cc2)OC)n3CCN2CCOCC2)c(C)on1
BRD3(2)	CBP30-383	BDOIA383	4600	124	2	nM	Cc1c(c2ccc3c(c2)nc(CCc2ccc(cc2)OC)n3CCN2CCOCC2)c(C)on1
BRD4(1)	CBP30-383	BDOIA383	700	33	2	nM	Cc1c(c2ccc3c(c2)nc(CCc2ccc(cc2)OC)n3CCN2CCOCC2)c(C)on1
BRD4(1,2)	CBP30-383	BDOIA383	nd				Cc1c(c2ccc3c(c2)nc(CCc2ccc(cc2)OC)n3CCN2CCOCC2)c(C)on1
BRD4(2)	CBP30-383	BDOIA383	6900	300	2	nM	Cc1c(c2ccc3c(c2)nc(CCc2ccc(cc2)OC)n3CCN2CCOCC2)c(C)on1
BRD4(full-length,short-iso.)	CBP30-383	BDOIA383	nd				Cc1c(c2ccc3c(c2)nc(CCc2ccc(cc2)OC)n3CCN2CCOCC2)c(C)on1
BRD7	CBP30-383	BDOIA383	nd				Cc1c(c2ccc3c(c2)nc(CCc2ccc(cc2)OC)n3CCN2CCOCC2)c(C)on1
BRD8(1)	CBP30-383	BDOIA383	nd				Cc1c(c2ccc3c(c2)nc(CCc2ccc(cc2)OC)n3CCN2CCOCC2)c(C)on1
BRD8(2)	CBP30-383	BDOIA383	nd				Cc1c(c2ccc3c(c2)nc(CCc2ccc(cc2)OC)n3CCN2CCOCC2)c(C)on1
BRD9	CBP30-383	BDOIA383	10000	2000	2	nM	Cc1c(c2ccc3c(c2)nc(CCc2ccc(cc2)OC)n3CCN2CCOCC2)c(C)on1
BRDT(1)	CBP30-383	BDOIA383	3600	510	2	nM	Cc1c(c2ccc3c(c2)nc(CCc2ccc(cc2)OC)n3CCN2CCOCC2)c(C)on1
BRDT(1,2)	CBP30-383	BDOIA383	nd				Cc1c(c2ccc3c(c2)nc(CCc2ccc(cc2)OC)n3CCN2CCOCC2)c(C)on1
BRDT(2)	CBP30-383	BDOIA383	18000	120	2	nM	Cc1c(c2ccc3c(c2)nc(CCc2ccc(cc2)OC)n3CCN2CCOCC2)c(C)on1
BRPF1	CBP30-383	BDOIA383	11000	1100	2	nM	Cc1c(c2ccc3c(c2)nc(CCc2ccc(cc2)OC)n3CCN2CCOCC2)c(C)on1
BRPF3	CBP30-383	BDOIA383	>50000		2	nM	Cc1c(c2ccc3c(c2)nc(CCc2ccc(cc2)OC)n3CCN2CCOCC2)c(C)on1
CECR2	CBP30-383	BDOIA383	nd				Cc1c(c2ccc3c(c2)nc(CCc2ccc(cc2)OC)n3CCN2CCOCC2)c(C)on1
CREBBP	CBP30-383	BDOIA383	59	0.46	2	nM	Cc1c(c2ccc3c(c2)nc(CCc2ccc(cc2)OC)n3CCN2CCOCC2)c(C)on1
EP300	CBP30-383	BDOIA383	44	2.8	2	nM	Cc1c(c2ccc3c(c2)nc(CCc2ccc(cc2)OC)n3CCN2CCOCC2)c(C)on1
FALZ	CBP30-383	BDOIA383	>50000		2	nM	Cc1c(c2ccc3c(c2)nc(CCc2ccc(cc2)OC)n3CCN2CCOCC2)c(C)on1
GCN5L2	CBP30-383	BDOIA383	nd				Cc1c(c2ccc3c(c2)nc(CCc2ccc(cc2)OC)n3CCN2CCOCC2)c(C)on1
PBRM1(2)	CBP30-383	BDOIA383	44000	6900	2	nM	Cc1c(c2ccc3c(c2)nc(CCc2ccc(cc2)OC)n3CCN2CCOCC2)c(C)on1
PBRM1(5)	CBP30-383	BDOIA383	nd				Cc1c(c2ccc3c(c2)nc(CCc2ccc(cc2)OC)n3CCN2CCOCC2)c(C)on1
PCAF	CBP30-383	BDOIA383	nd				Cc1c(c2ccc3c(c2)nc(CCc2ccc(cc2)OC)n3CCN2CCOCC2)c(C)on1
SMARCA2	CBP30-383	BDOIA383	nd				Cc1c(c2ccc3c(c2)nc(CCc2ccc(cc2)OC)n3CCN2CCOCC2)c(C)on1
SMARCA2(iso.A)	CBP30-383	BDOIA383	nd				Cc1c(c2ccc3c(c2)nc(CCc2ccc(cc2)OC)n3CCN2CCOCC2)c(C)on1
SMARCA4	CBP30-383	BDOIA383	nd				Cc1c(c2ccc3c(c2)nc(CCc2ccc(cc2)OC)n3CCN2CCOCC2)c(C)on1
TAF1(2)	CBP30-383	BDOIA383	1600	27	2	nM	Cc1c(c2ccc3c(c2)nc(CCc2ccc(cc2)OC)n3CCN2CCOCC2)c(C)on1
TAF1L(2)	CBP30-383	BDOIA383	14000	1000	2	nM	Cc1c(c2ccc3c(c2)nc(CCc2ccc(cc2)OC)n3CCN2CCOCC2)c(C)on1
TRIM24(Bromo.)	CBP30-383	BDOIA383	nd				Cc1c(c2ccc3c(c2)nc(CCc2ccc(cc2)OC)n3CCN2CCOCC2)c(C)on1
TRIM24(PHD,Bromo.)	CBP30-383	BDOIA383	26000	9400	2	nM	Cc1c(c2ccc3c(c2)nc(CCc2ccc(cc2)OC)n3CCN2CCOCC2)c(C)on1
TRIM33(PHD,Bromo.)	CBP30-383	BDOIA383	>50000		2	nM	Cc1c(c2ccc3c(c2)nc(CCc2ccc(cc2)OC)n3CCN2CCOCC2)c(C)on1
WDR9(2)	CBP30-383	BDOIA383	41000	11000	2	nM	Cc1c(c2ccc3c(c2)nc(CCc2ccc(cc2)OC)n3CCN2CCOCC2)c(C)on1
ATAD2A	Bromosporine	Bromosporine	62000	11000	4	nM	CCOC(=O)NC1=CC(=NN2C1=NN=C2C)C3=CC(=C(C=C3)C)NS(=O)(=O)C
ATAD2B	Bromosporine	Bromosporine	30000	7100	2	nM	CCOC(=O)NC1=CC(=NN2C1=NN=C2C)C3=CC(=C(C=C3)C)NS(=O)(=O)C
BAZ1B	Bromosporine	Bromosporine	38000	10000	4	nM	CCOC(=O)NC1=CC(=NN2C1=NN=C2C)C3=CC(=C(C=C3)C)NS(=O)(=O)C
BAZ2A	Bromosporine	Bromosporine	3800	1200	2	nM	CCOC(=O)NC1=CC(=NN2C1=NN=C2C)C3=CC(=C(C=C3)C)NS(=O)(=O)C
BAZ2B	Bromosporine	Bromosporine	9100	1300	2	nM	CCOC(=O)NC1=CC(=NN2C1=NN=C2C)C3=CC(=C(C=C3)C)NS(=O)(=O)C
BRD1	Bromosporine	Bromosporine	1100	320	2	nM	CCOC(=O)NC1=CC(=NN2C1=NN=C2C)C3=CC(=C(C=C3)C)NS(=O)(=O)C
BRD2(1)	Bromosporine	Bromosporine	220	33	2	nM	CCOC(=O)NC1=CC(=NN2C1=NN=C2C)C3=CC(=C(C=C3)C)NS(=O)(=O)C
BRD2(1,2)	Bromosporine	Bromosporine	66.5	0.71	2	nM	CCOC(=O)NC1=CC(=NN2C1=NN=C2C)C3=CC(=C(C=C3)C)NS(=O)(=O)C
BRD2(2)	Bromosporine	Bromosporine	84	2.2	2	nM	CCOC(=O)NC1=CC(=NN2C1=NN=C2C)C3=CC(=C(C=C3)C)NS(=O)(=O)C
BRD3(1)	Bromosporine	Bromosporine	160	4.1	2	nM	CCOC(=O)NC1=CC(=NN2C1=NN=C2C)C3=CC(=C(C=C3)C)NS(=O)(=O)C
BRD3(1,2)	Bromosporine	Bromosporine	30	2.83	2	nM	CCOC(=O)NC1=CC(=NN2C1=NN=C2C)C3=CC(=C(C=C3)C)NS(=O)(=O)C
BRD3(2)	Bromosporine	Bromosporine	76	0.9	2	nM	CCOC(=O)NC1=CC(=NN2C1=NN=C2C)C3=CC(=C(C=C3)C)NS(=O)(=O)C
BRD4(1)	Bromosporine	Bromosporine	38	2.9	2	nM	CCOC(=O)NC1=CC(=NN2C1=NN=C2C)C3=CC(=C(C=C3)C)NS(=O)(=O)C
BRD4(1,2)	Bromosporine	Bromosporine	30.5	3.54	2	nM	CCOC(=O)NC1=CC(=NN2C1=NN=C2C)C3=CC(=C(C=C3)C)NS(=O)(=O)C
BRD4(2)	Bromosporine	Bromosporine	40	1.2	2	nM	CCOC(=O)NC1=CC(=NN2C1=NN=C2C)C3=CC(=C(C=C3)C)NS(=O)(=O)C
BRD4(full-length,short-iso.)	Bromosporine	Bromosporine	25.5	2.12	2	nM	CCOC(=O)NC1=CC(=NN2C1=NN=C2C)C3=CC(=C(C=C3)C)NS(=O)(=O)C
BRD7	Bromosporine	Bromosporine	82	34	6	nM	CCOC(=O)NC1=CC(=NN2C1=NN=C2C)C3=CC(=C(C=C3)C)NS(=O)(=O)C
BRD8(1)	Bromosporine	Bromosporine	28000	15000	7	nM	CCOC(=O)NC1=CC(=NN2C1=NN=C2C)C3=CC(=C(C=C3)C)NS(=O)(=O)C
BRD8(2)	Bromosporine	Bromosporine	40000	24000	8	nM	CCOC(=O)NC1=CC(=NN2C1=NN=C2C)C3=CC(=C(C=C3)C)NS(=O)(=O)C
BRD9	Bromosporine	Bromosporine	6	4.1	2	nM	CCOC(=O)NC1=CC(=NN2C1=NN=C2C)C3=CC(=C(C=C3)C)NS(=O)(=O)C
BRDT(1)	Bromosporine	Bromosporine	58	12	2	nM	CCOC(=O)NC1=CC(=NN2C1=NN=C2C)C3=CC(=C(C=C3)C)NS(=O)(=O)C
BRDT(1,2)	Bromosporine	Bromosporine	87	4.24	2	nM	CCOC(=O)NC1=CC(=NN2C1=NN=C2C)C3=CC(=C(C=C3)C)NS(=O)(=O)C
BRDT(2)	Bromosporine	Bromosporine	260	51	2	nM	CCOC(=O)NC1=CC(=NN2C1=NN=C2C)C3=CC(=C(C=C3)C)NS(=O)(=O)C
BRPF1	Bromosporine	Bromosporine	600	51	2	nM	CCOC(=O)NC1=CC(=NN2C1=NN=C2C)C3=CC(=C(C=C3)C)NS(=O)(=O)C
BRPF3	Bromosporine	Bromosporine	6000	1900	8	nM	CCOC(=O)NC1=CC(=NN2C1=NN=C2C)C3=CC(=C(C=C3)C)NS(=O)(=O)C
CECR2	Bromosporine	Bromosporine	11	4.1	6	nM	CCOC(=O)NC1=CC(=NN2C1=NN=C2C)C3=CC(=C(C=C3)C)NS(=O)(=O)C
CREBBP	Bromosporine	Bromosporine	950	80	2	nM	CCOC(=O)NC1=CC(=NN2C1=NN=C2C)C3=CC(=C(C=C3)C)NS(=O)(=O)C
EP300	Bromosporine	Bromosporine	1600	55	2	nM	CCOC(=O)NC1=CC(=NN2C1=NN=C2C)C3=CC(=C(C=C3)C)NS(=O)(=O)C
FALZ	Bromosporine	Bromosporine	3300	36	2	nM	CCOC(=O)NC1=CC(=NN2C1=NN=C2C)C3=CC(=C(C=C3)C)NS(=O)(=O)C
GCN5L2	Bromosporine	Bromosporine	12000	48	2	nM	CCOC(=O)NC1=CC(=NN2C1=NN=C2C)C3=CC(=C(C=C3)C)NS(=O)(=O)C
PBRM1(2)	Bromosporine	Bromosporine	>50000		2	nM	CCOC(=O)NC1=CC(=NN2C1=NN=C2C)C3=CC(=C(C=C3)C)NS(=O)(=O)C
PBRM1(5)	Bromosporine	Bromosporine	27000	8400	2	nM	CCOC(=O)NC1=CC(=NN2C1=NN=C2C)C3=CC(=C(C=C3)C)NS(=O)(=O)C
PCAF	Bromosporine	Bromosporine	11000	3000	2	nM	CCOC(=O)NC1=CC(=NN2C1=NN=C2C)C3=CC(=C(C=C3)C)NS(=O)(=O)C
SMARCA2	Bromosporine	Bromosporine	4600	210	2	nM	CCOC(=O)NC1=CC(=NN2C1=NN=C2C)C3=CC(=C(C=C3)C)NS(=O)(=O)C
SMARCA2(iso.A)	Bromosporine	Bromosporine	6200	160	2	nM	CCOC(=O)NC1=CC(=NN2C1=NN=C2C)C3=CC(=C(C=C3)C)NS(=O)(=O)C
SMARCA4	Bromosporine	Bromosporine	4000	1300	18	nM	CCOC(=O)NC1=CC(=NN2C1=NN=C2C)C3=CC(=C(C=C3)C)NS(=O)(=O)C
TAF1(2)	Bromosporine	Bromosporine	3.6	1	2	nM	CCOC(=O)NC1=CC(=NN2C1=NN=C2C)C3=CC(=C(C=C3)C)NS(=O)(=O)C
TAF1L(2)	Bromosporine	Bromosporine	11	1.4	2	nM	CCOC(=O)NC1=CC(=NN2C1=NN=C2C)C3=CC(=C(C=C3)C)NS(=O)(=O)C
TRIM24(Bromo.)	Bromosporine	Bromosporine	6800	760	4	nM	CCOC(=O)NC1=CC(=NN2C1=NN=C2C)C3=CC(=C(C=C3)C)NS(=O)(=O)C
TRIM24(PHD,Bromo.)	Bromosporine	Bromosporine	29000	3700	2	nM	CCOC(=O)NC1=CC(=NN2C1=NN=C2C)C3=CC(=C(C=C3)C)NS(=O)(=O)C
TRIM33(PHD,Bromo.)	Bromosporine	Bromosporine	>50000		2	nM	CCOC(=O)NC1=CC(=NN2C1=NN=C2C)C3=CC(=C(C=C3)C)NS(=O)(=O)C
WDR9(2)	Bromosporine	Bromosporine	>50000		2	nM	CCOC(=O)NC1=CC(=NN2C1=NN=C2C)C3=CC(=C(C=C3)C)NS(=O)(=O)C
ATAD2A	GSK2801	GSK2801	>100000		2	nM	CCCOC1=CC2=C(C3=C(S(C)(=O)=O)C=CC=C3)C=C(C(C)=O)N2C=C1
ATAD2B	GSK2801	GSK2801	>100000		2	nM	CCCOC1=CC2=C(C3=C(S(C)(=O)=O)C=CC=C3)C=C(C(C)=O)N2C=C1
BAZ1B	GSK2801	GSK2801	>100000		2	nM	CCCOC1=CC2=C(C3=C(S(C)(=O)=O)C=CC=C3)C=C(C(C)=O)N2C=C1
BAZ2A	GSK2801	GSK2801	430	55	2	nM	CCCOC1=CC2=C(C3=C(S(C)(=O)=O)C=CC=C3)C=C(C(C)=O)N2C=C1
BAZ2B	GSK2801	GSK2801	170	8.4	2	nM	CCCOC1=CC2=C(C3=C(S(C)(=O)=O)C=CC=C3)C=C(C(C)=O)N2C=C1
BRD1	GSK2801	GSK2801	60000	24000	2	nM	CCCOC1=CC2=C(C3=C(S(C)(=O)=O)C=CC=C3)C=C(C(C)=O)N2C=C1
BRD2(1)	GSK2801	GSK2801	41000	1900	2	nM	CCCOC1=CC2=C(C3=C(S(C)(=O)=O)C=CC=C3)C=C(C(C)=O)N2C=C1
BRD2(1,2)	GSK2801	GSK2801	19000	460	2	nM	CCCOC1=CC2=C(C3=C(S(C)(=O)=O)C=CC=C3)C=C(C(C)=O)N2C=C1
BRD2(2)	GSK2801	GSK2801	22000	3400	2	nM	CCCOC1=CC2=C(C3=C(S(C)(=O)=O)C=CC=C3)C=C(C(C)=O)N2C=C1
BRD3(1)	GSK2801	GSK2801	34000	5200	2	nM	CCCOC1=CC2=C(C3=C(S(C)(=O)=O)C=CC=C3)C=C(C(C)=O)N2C=C1
BRD3(1,2)	GSK2801	GSK2801	17000	4800	2	nM	CCCOC1=CC2=C(C3=C(S(C)(=O)=O)C=CC=C3)C=C(C(C)=O)N2C=C1
BRD3(2)	GSK2801	GSK2801	13000	1200	2	nM	CCCOC1=CC2=C(C3=C(S(C)(=O)=O)C=CC=C3)C=C(C(C)=O)N2C=C1
BRD4(1)	GSK2801	GSK2801	74000	4000	2	nM	CCCOC1=CC2=C(C3=C(S(C)(=O)=O)C=CC=C3)C=C(C(C)=O)N2C=C1
BRD4(1,2)	GSK2801	GSK2801	65000	3500	2	nM	CCCOC1=CC2=C(C3=C(S(C)(=O)=O)C=CC=C3)C=C(C(C)=O)N2C=C1
BRD4(2)	GSK2801	GSK2801	29000	1800	2	nM	CCCOC1=CC2=C(C3=C(S(C)(=O)=O)C=CC=C3)C=C(C(C)=O)N2C=C1
BRD4(full-length,short-iso.)	GSK2801	GSK2801	41000	17000	2	nM	CCCOC1=CC2=C(C3=C(S(C)(=O)=O)C=CC=C3)C=C(C(C)=O)N2C=C1
BRD7	GSK2801	GSK2801	22000	2400	2	nM	CCCOC1=CC2=C(C3=C(S(C)(=O)=O)C=CC=C3)C=C(C(C)=O)N2C=C1
BRD8(1)	GSK2801	GSK2801	>100000		2	nM	CCCOC1=CC2=C(C3=C(S(C)(=O)=O)C=CC=C3)C=C(C(C)=O)N2C=C1
BRD8(2)	GSK2801	GSK2801	>100000		2	nM	CCCOC1=CC2=C(C3=C(S(C)(=O)=O)C=CC=C3)C=C(C(C)=O)N2C=C1
BRD9	GSK2801	GSK2801	120	19	2	nM	CCCOC1=CC2=C(C3=C(S(C)(=O)=O)C=CC=C3)C=C(C(C)=O)N2C=C1
BRDT(1)	GSK2801	GSK2801	30000	9400	2	nM	CCCOC1=CC2=C(C3=C(S(C)(=O)=O)C=CC=C3)C=C(C(C)=O)N2C=C1
BRDT(1,2)	GSK2801	GSK2801	52000	5700	2	nM	CCCOC1=CC2=C(C3=C(S(C)(=O)=O)C=CC=C3)C=C(C(C)=O)N2C=C1
BRDT(2)	GSK2801	GSK2801	67000	36000	2	nM	CCCOC1=CC2=C(C3=C(S(C)(=O)=O)C=CC=C3)C=C(C(C)=O)N2C=C1
BRPF1	GSK2801	GSK2801	14000	3.5	2	nM	CCCOC1=CC2=C(C3=C(S(C)(=O)=O)C=CC=C3)C=C(C(C)=O)N2C=C1
BRPF3	GSK2801	GSK2801	15000	3500	2	nM	CCCOC1=CC2=C(C3=C(S(C)(=O)=O)C=CC=C3)C=C(C(C)=O)N2C=C1
CECR2	GSK2801	GSK2801	9000	2200	2	nM	CCCOC1=CC2=C(C3=C(S(C)(=O)=O)C=CC=C3)C=C(C(C)=O)N2C=C1
CREBBP	GSK2801	GSK2801	21000	6400	2	nM	CCCOC1=CC2=C(C3=C(S(C)(=O)=O)C=CC=C3)C=C(C(C)=O)N2C=C1
EP300	GSK2801	GSK2801	70000	34000	2	nM	CCCOC1=CC2=C(C3=C(S(C)(=O)=O)C=CC=C3)C=C(C(C)=O)N2C=C1
FALZ	GSK2801	GSK2801	95000	21000	2	nM	CCCOC1=CC2=C(C3=C(S(C)(=O)=O)C=CC=C3)C=C(C(C)=O)N2C=C1
GCN5L2	GSK2801	GSK2801	>100000		2	nM	CCCOC1=CC2=C(C3=C(S(C)(=O)=O)C=CC=C3)C=C(C(C)=O)N2C=C1
PBRM1(2)	GSK2801	GSK2801	>100000		2	nM	CCCOC1=CC2=C(C3=C(S(C)(=O)=O)C=CC=C3)C=C(C(C)=O)N2C=C1
PBRM1(5)	GSK2801	GSK2801	>100000	NA	2	nM	CCCOC1=CC2=C(C3=C(S(C)(=O)=O)C=CC=C3)C=C(C(C)=O)N2C=C1
PCAF	GSK2801	GSK2801	>100000		2	nM	CCCOC1=CC2=C(C3=C(S(C)(=O)=O)C=CC=C3)C=C(C(C)=O)N2C=C1
SMARCA2	GSK2801	GSK2801	>100000		2	nM	CCCOC1=CC2=C(C3=C(S(C)(=O)=O)C=CC=C3)C=C(C(C)=O)N2C=C1
SMARCA2(iso.A)	GSK2801	GSK2801	>100000		2	nM	CCCOC1=CC2=C(C3=C(S(C)(=O)=O)C=CC=C3)C=C(C(C)=O)N2C=C1
SMARCA4	GSK2801	GSK2801	>100000		2	nM	CCCOC1=CC2=C(C3=C(S(C)(=O)=O)C=CC=C3)C=C(C(C)=O)N2C=C1
TAF1(2)	GSK2801	GSK2801	1400	150	2	nM	CCCOC1=CC2=C(C3=C(S(C)(=O)=O)C=CC=C3)C=C(C(C)=O)N2C=C1
TAF1L(2)	GSK2801	GSK2801	5100	540	2	nM	CCCOC1=CC2=C(C3=C(S(C)(=O)=O)C=CC=C3)C=C(C(C)=O)N2C=C1
TRIM24(Bromo.)	GSK2801	GSK2801	24000	9000	2	nM	CCCOC1=CC2=C(C3=C(S(C)(=O)=O)C=CC=C3)C=C(C(C)=O)N2C=C1
TRIM24(PHD,Bromo.)	GSK2801	GSK2801	33000	16000	2	nM	CCCOC1=CC2=C(C3=C(S(C)(=O)=O)C=CC=C3)C=C(C(C)=O)N2C=C1
TRIM33(PHD,Bromo.)	GSK2801	GSK2801	>100000		2	nM	CCCOC1=CC2=C(C3=C(S(C)(=O)=O)C=CC=C3)C=C(C(C)=O)N2C=C1
WDR9(2)	GSK2801	GSK2801	>100000		2	nM	CCCOC1=CC2=C(C3=C(S(C)(=O)=O)C=CC=C3)C=C(C(C)=O)N2C=C1
ATAD2A	I-CBP112	I-CBP112	>100000		6	nM	COC(C(OC)=C1)=CC=C1C2=CC(OC[C@H]3CCCN(C)C3)=C(OCCN(C(CC)=O)C4)C4=C2
ATAD2B	I-CBP112	I-CBP112	71000	11000	2	nM	COC(C(OC)=C1)=CC=C1C2=CC(OC[C@H]3CCCN(C)C3)=C(OCCN(C(CC)=O)C4)C4=C2
BAZ1B	I-CBP112	I-CBP112	>100000		2	nM	COC(C(OC)=C1)=CC=C1C2=CC(OC[C@H]3CCCN(C)C3)=C(OCCN(C(CC)=O)C4)C4=C2
BAZ2A	I-CBP112	I-CBP112	70000	6200	2	nM	COC(C(OC)=C1)=CC=C1C2=CC(OC[C@H]3CCCN(C)C3)=C(OCCN(C(CC)=O)C4)C4=C2
BAZ2B	I-CBP112	I-CBP112	28000	5900	4	nM	COC(C(OC)=C1)=CC=C1C2=CC(OC[C@H]3CCCN(C)C3)=C(OCCN(C(CC)=O)C4)C4=C2
BRD1	I-CBP112	I-CBP112	51000	3500	2	nM	COC(C(OC)=C1)=CC=C1C2=CC(OC[C@H]3CCCN(C)C3)=C(OCCN(C(CC)=O)C4)C4=C2
BRD2(1)	I-CBP112	I-CBP112	5700	870	2	nM	COC(C(OC)=C1)=CC=C1C2=CC(OC[C@H]3CCCN(C)C3)=C(OCCN(C(CC)=O)C4)C4=C2
BRD2(1,2)	I-CBP112	I-CBP112	6900	750	2	nM	COC(C(OC)=C1)=CC=C1C2=CC(OC[C@H]3CCCN(C)C3)=C(OCCN(C(CC)=O)C4)C4=C2
BRD2(2)	I-CBP112	I-CBP112	26000	6300	2	nM	COC(C(OC)=C1)=CC=C1C2=CC(OC[C@H]3CCCN(C)C3)=C(OCCN(C(CC)=O)C4)C4=C2
BRD3(1)	I-CBP112	I-CBP112	5400	110	2	nM	COC(C(OC)=C1)=CC=C1C2=CC(OC[C@H]3CCCN(C)C3)=C(OCCN(C(CC)=O)C4)C4=C2
BRD3(1,2)	I-CBP112	I-CBP112	6300	640	2	nM	COC(C(OC)=C1)=CC=C1C2=CC(OC[C@H]3CCCN(C)C3)=C(OCCN(C(CC)=O)C4)C4=C2
BRD3(2)	I-CBP112	I-CBP112	20000	14000	2	nM	COC(C(OC)=C1)=CC=C1C2=CC(OC[C@H]3CCCN(C)C3)=C(OCCN(C(CC)=O)C4)C4=C2
BRD4(1)	I-CBP112	I-CBP112	2900	690	2	nM	COC(C(OC)=C1)=CC=C1C2=CC(OC[C@H]3CCCN(C)C3)=C(OCCN(C(CC)=O)C4)C4=C2
BRD4(1,2)	I-CBP112	I-CBP112	11000	35	2	nM	COC(C(OC)=C1)=CC=C1C2=CC(OC[C@H]3CCCN(C)C3)=C(OCCN(C(CC)=O)C4)C4=C2
BRD4(2)	I-CBP112	I-CBP112	16000	4700	2	nM	COC(C(OC)=C1)=CC=C1C2=CC(OC[C@H]3CCCN(C)C3)=C(OCCN(C(CC)=O)C4)C4=C2
BRD4(full-length,short-iso.)	I-CBP112	I-CBP112	2854.47	388.08	2	nM	COC(C(OC)=C1)=CC=C1C2=CC(OC[C@H]3CCCN(C)C3)=C(OCCN(C(CC)=O)C4)C4=C2
BRD7	I-CBP112	I-CBP112	7600	950	2	nM	COC(C(OC)=C1)=CC=C1C2=CC(OC[C@H]3CCCN(C)C3)=C(OCCN(C(CC)=O)C4)C4=C2
BRD8(1)	I-CBP112	I-CBP112	>100000		2	nM	COC(C(OC)=C1)=CC=C1C2=CC(OC[C@H]3CCCN(C)C3)=C(OCCN(C(CC)=O)C4)C4=C2
BRD8(2)	I-CBP112	I-CBP112	>100000		2	nM	COC(C(OC)=C1)=CC=C1C2=CC(OC[C@H]3CCCN(C)C3)=C(OCCN(C(CC)=O)C4)C4=C2
BRD9	I-CBP112	I-CBP112	25000	2600	2	nM	COC(C(OC)=C1)=CC=C1C2=CC(OC[C@H]3CCCN(C)C3)=C(OCCN(C(CC)=O)C4)C4=C2
BRDT(1)	I-CBP112	I-CBP112	4200	87	2	nM	COC(C(OC)=C1)=CC=C1C2=CC(OC[C@H]3CCCN(C)C3)=C(OCCN(C(CC)=O)C4)C4=C2
BRDT(1,2)	I-CBP112	I-CBP112	9600	140	2	nM	COC(C(OC)=C1)=CC=C1C2=CC(OC[C@H]3CCCN(C)C3)=C(OCCN(C(CC)=O)C4)C4=C2
BRDT(2)	I-CBP112	I-CBP112	49000	10000	2	nM	COC(C(OC)=C1)=CC=C1C2=CC(OC[C@H]3CCCN(C)C3)=C(OCCN(C(CC)=O)C4)C4=C2
BRPF1	I-CBP112	I-CBP112	20000	1100	2	nM	COC(C(OC)=C1)=CC=C1C2=CC(OC[C@H]3CCCN(C)C3)=C(OCCN(C(CC)=O)C4)C4=C2
BRPF3	I-CBP112	I-CBP112	95000	40000	2	nM	COC(C(OC)=C1)=CC=C1C2=CC(OC[C@H]3CCCN(C)C3)=C(OCCN(C(CC)=O)C4)C4=C2
CECR2	I-CBP112	I-CBP112	17000	2100	2	nM	COC(C(OC)=C1)=CC=C1C2=CC(OC[C@H]3CCCN(C)C3)=C(OCCN(C(CC)=O)C4)C4=C2
CREBBP	I-CBP112	I-CBP112	60	9	2	nM	COC(C(OC)=C1)=CC=C1C2=CC(OC[C@H]3CCCN(C)C3)=C(OCCN(C(CC)=O)C4)C4=C2
EP300	I-CBP112	I-CBP112	120	44	2	nM	COC(C(OC)=C1)=CC=C1C2=CC(OC[C@H]3CCCN(C)C3)=C(OCCN(C(CC)=O)C4)C4=C2
FALZ	I-CBP112	I-CBP112	5500	10	2	nM	COC(C(OC)=C1)=CC=C1C2=CC(OC[C@H]3CCCN(C)C3)=C(OCCN(C(CC)=O)C4)C4=C2
GCN5L2	I-CBP112	I-CBP112	>100000		2	nM	COC(C(OC)=C1)=CC=C1C2=CC(OC[C@H]3CCCN(C)C3)=C(OCCN(C(CC)=O)C4)C4=C2
PBRM1(2)	I-CBP112	I-CBP112	>100000		2	nM	COC(C(OC)=C1)=CC=C1C2=CC(OC[C@H]3CCCN(C)C3)=C(OCCN(C(CC)=O)C4)C4=C2
PBRM1(5)	I-CBP112	I-CBP112	>100000	NA	2	nM	COC(C(OC)=C1)=CC=C1C2=CC(OC[C@H]3CCCN(C)C3)=C(OCCN(C(CC)=O)C4)C4=C2
PCAF	I-CBP112	I-CBP112	77000	27000	2	nM	COC(C(OC)=C1)=CC=C1C2=CC(OC[C@H]3CCCN(C)C3)=C(OCCN(C(CC)=O)C4)C4=C2
SMARCA2	I-CBP112	I-CBP112	>100000		2	nM	COC(C(OC)=C1)=CC=C1C2=CC(OC[C@H]3CCCN(C)C3)=C(OCCN(C(CC)=O)C4)C4=C2
SMARCA2(iso.A)	I-CBP112	I-CBP112	>100000		2	nM	COC(C(OC)=C1)=CC=C1C2=CC(OC[C@H]3CCCN(C)C3)=C(OCCN(C(CC)=O)C4)C4=C2
SMARCA4	I-CBP112	I-CBP112	>100000		2	nM	COC(C(OC)=C1)=CC=C1C2=CC(OC[C@H]3CCCN(C)C3)=C(OCCN(C(CC)=O)C4)C4=C2
TAF1(2)	I-CBP112	I-CBP112	45000	340	4	nM	COC(C(OC)=C1)=CC=C1C2=CC(OC[C@H]3CCCN(C)C3)=C(OCCN(C(CC)=O)C4)C4=C2
TAF1L(2)	I-CBP112	I-CBP112	52000	13000	2	nM	COC(C(OC)=C1)=CC=C1C2=CC(OC[C@H]3CCCN(C)C3)=C(OCCN(C(CC)=O)C4)C4=C2
TRIM24(Bromo.)	I-CBP112	I-CBP112	12000	170	2	nM	COC(C(OC)=C1)=CC=C1C2=CC(OC[C@H]3CCCN(C)C3)=C(OCCN(C(CC)=O)C4)C4=C2
TRIM24(PHD,Bromo.)	I-CBP112	I-CBP112	14000	1700	2	nM	COC(C(OC)=C1)=CC=C1C2=CC(OC[C@H]3CCCN(C)C3)=C(OCCN(C(CC)=O)C4)C4=C2
TRIM33(PHD,Bromo.)	I-CBP112	I-CBP112	>100000		2	nM	COC(C(OC)=C1)=CC=C1C2=CC(OC[C@H]3CCCN(C)C3)=C(OCCN(C(CC)=O)C4)C4=C2
WDR9(2)	I-CBP112	I-CBP112	59000	17000	2	nM	COC(C(OC)=C1)=CC=C1C2=CC(OC[C@H]3CCCN(C)C3)=C(OCCN(C(CC)=O)C4)C4=C2
ATAD2A	NI 57	NIC57	>50000		2	nM	O=S(NC1=CC=C(N(C)C(C(C)=C2)=O)C2=C1)(C3=C(OC)C=C(C#N)C=C3)=O
ATAD2B	NI 57	NIC57	>50000		2	nM	O=S(NC1=CC=C(N(C)C(C(C)=C2)=O)C2=C1)(C3=C(OC)C=C(C#N)C=C3)=O
BAZ1B	NI 57	NIC57					O=S(NC1=CC=C(N(C)C(C(C)=C2)=O)C2=C1)(C3=C(OC)C=C(C#N)C=C3)=O
BAZ2A	NI 57	NIC57	>50000		2	nM	O=S(NC1=CC=C(N(C)C(C(C)=C2)=O)C2=C1)(C3=C(OC)C=C(C#N)C=C3)=O
BAZ2B	NI 57	NIC57	9400	2000	2	nM	O=S(NC1=CC=C(N(C)C(C(C)=C2)=O)C2=C1)(C3=C(OC)C=C(C#N)C=C3)=O
BRD1	NI 57	NIC57	46	11	2	nM	O=S(NC1=CC=C(N(C)C(C(C)=C2)=O)C2=C1)(C3=C(OC)C=C(C#N)C=C3)=O
BRD2(1)	NI 57	NIC57	5900	350	2	nM	O=S(NC1=CC=C(N(C)C(C(C)=C2)=O)C2=C1)(C3=C(OC)C=C(C#N)C=C3)=O
BRD2(1,2)	NI 57	NIC57	12000	1800	2	nM	O=S(NC1=CC=C(N(C)C(C(C)=C2)=O)C2=C1)(C3=C(OC)C=C(C#N)C=C3)=O
BRD2(2)	NI 57	NIC57	>50000		2	nM	O=S(NC1=CC=C(N(C)C(C(C)=C2)=O)C2=C1)(C3=C(OC)C=C(C#N)C=C3)=O
BRD3(1)	NI 57	NIC57	7200	180	2	nM	O=S(NC1=CC=C(N(C)C(C(C)=C2)=O)C2=C1)(C3=C(OC)C=C(C#N)C=C3)=O
BRD3(1,2)	NI 57	NIC57	12000	1300	2	nM	O=S(NC1=CC=C(N(C)C(C(C)=C2)=O)C2=C1)(C3=C(OC)C=C(C#N)C=C3)=O
BRD3(2)	NI 57	NIC57	>50000		2	nM	O=S(NC1=CC=C(N(C)C(C(C)=C2)=O)C2=C1)(C3=C(OC)C=C(C#N)C=C3)=O
BRD4(1)	NI 57	NIC57	3300	140	2	nM	O=S(NC1=CC=C(N(C)C(C(C)=C2)=O)C2=C1)(C3=C(OC)C=C(C#N)C=C3)=O
BRD4(1,2)	NI 57	NIC57	15000	630	2	nM	O=S(NC1=CC=C(N(C)C(C(C)=C2)=O)C2=C1)(C3=C(OC)C=C(C#N)C=C3)=O
BRD4(2)	NI 57	NIC57	>50000		2	nM	O=S(NC1=CC=C(N(C)C(C(C)=C2)=O)C2=C1)(C3=C(OC)C=C(C#N)C=C3)=O
BRD4(full-length,short-iso.)	NI 57	NIC57	4900	0.73	2	nM	O=S(NC1=CC=C(N(C)C(C(C)=C2)=O)C2=C1)(C3=C(OC)C=C(C#N)C=C3)=O
BRD7	NI 57	NIC57	100	2.3	2	nM	O=S(NC1=CC=C(N(C)C(C(C)=C2)=O)C2=C1)(C3=C(OC)C=C(C#N)C=C3)=O
BRD8(1)	NI 57	NIC57	>50000		2	nM	O=S(NC1=CC=C(N(C)C(C(C)=C2)=O)C2=C1)(C3=C(OC)C=C(C#N)C=C3)=O
BRD8(2)	NI 57	NIC57	>50000		2	nM	O=S(NC1=CC=C(N(C)C(C(C)=C2)=O)C2=C1)(C3=C(OC)C=C(C#N)C=C3)=O
BRD9	NI 57	NIC57	160	6	2	nM	O=S(NC1=CC=C(N(C)C(C(C)=C2)=O)C2=C1)(C3=C(OC)C=C(C#N)C=C3)=O
BRDT(1)	NI 57	NIC57	4800	1600	2	nM	O=S(NC1=CC=C(N(C)C(C(C)=C2)=O)C2=C1)(C3=C(OC)C=C(C#N)C=C3)=O
BRDT(1,2)	NI 57	NIC57	>50000		2	nM	O=S(NC1=CC=C(N(C)C(C(C)=C2)=O)C2=C1)(C3=C(OC)C=C(C#N)C=C3)=O
BRDT(2)	NI 57	NIC57	>50000		2	nM	O=S(NC1=CC=C(N(C)C(C(C)=C2)=O)C2=C1)(C3=C(OC)C=C(C#N)C=C3)=O
BRPF1	NI 57	NIC57	4	1	2	nM	O=S(NC1=CC=C(N(C)C(C(C)=C2)=O)C2=C1)(C3=C(OC)C=C(C#N)C=C3)=O
BRPF3	NI 57	NIC57	110	4.9	2	nM	O=S(NC1=CC=C(N(C)C(C(C)=C2)=O)C2=C1)(C3=C(OC)C=C(C#N)C=C3)=O
CECR2	NI 57	NIC57	12000	2000	2	nM	O=S(NC1=CC=C(N(C)C(C(C)=C2)=O)C2=C1)(C3=C(OC)C=C(C#N)C=C3)=O
CREBBP	NI 57	NIC57	13000	2400	2	nM	O=S(NC1=CC=C(N(C)C(C(C)=C2)=O)C2=C1)(C3=C(OC)C=C(C#N)C=C3)=O
EP300	NI 57	NIC57	15000	840	2	nM	O=S(NC1=CC=C(N(C)C(C(C)=C2)=O)C2=C1)(C3=C(OC)C=C(C#N)C=C3)=O
FALZ	NI 57	NIC57	2300	460	2	nM	O=S(NC1=CC=C(N(C)C(C(C)=C2)=O)C2=C1)(C3=C(OC)C=C(C#N)C=C3)=O
GCN5L2	NI 57	NIC57	4100	1100	2	nM	O=S(NC1=CC=C(N(C)C(C(C)=C2)=O)C2=C1)(C3=C(OC)C=C(C#N)C=C3)=O
PBRM1(2)	NI 57	NIC57	>50000		2	nM	O=S(NC1=CC=C(N(C)C(C(C)=C2)=O)C2=C1)(C3=C(OC)C=C(C#N)C=C3)=O
PBRM1(5)	NI 57	NIC57	11000	2700	2	nM	O=S(NC1=CC=C(N(C)C(C(C)=C2)=O)C2=C1)(C3=C(OC)C=C(C#N)C=C3)=O
PCAF	NI 57	NIC57	4200	160	2	nM	O=S(NC1=CC=C(N(C)C(C(C)=C2)=O)C2=C1)(C3=C(OC)C=C(C#N)C=C3)=O
SMARCA2	NI 57	NIC57	>50000		2	nM	O=S(NC1=CC=C(N(C)C(C(C)=C2)=O)C2=C1)(C3=C(OC)C=C(C#N)C=C3)=O
SMARCA2(iso.A)	NI 57	NIC57					O=S(NC1=CC=C(N(C)C(C(C)=C2)=O)C2=C1)(C3=C(OC)C=C(C#N)C=C3)=O
SMARCA4	NI 57	NIC57	41000	83	2	nM	O=S(NC1=CC=C(N(C)C(C(C)=C2)=O)C2=C1)(C3=C(OC)C=C(C#N)C=C3)=O
TAF1(2)	NI 57	NIC57	4900	610	2	nM	O=S(NC1=CC=C(N(C)C(C(C)=C2)=O)C2=C1)(C3=C(OC)C=C(C#N)C=C3)=O
TAF1L(2)	NI 57	NIC57	5500	96	2	nM	O=S(NC1=CC=C(N(C)C(C(C)=C2)=O)C2=C1)(C3=C(OC)C=C(C#N)C=C3)=O
TRIM24(Bromo.)	NI 57	NIC57	1600	250	2	nM	O=S(NC1=CC=C(N(C)C(C(C)=C2)=O)C2=C1)(C3=C(OC)C=C(C#N)C=C3)=O
TRIM24(PHD,Bromo.)	NI 57	NIC57	5600	290	2	nM	O=S(NC1=CC=C(N(C)C(C(C)=C2)=O)C2=C1)(C3=C(OC)C=C(C#N)C=C3)=O
TRIM33(PHD,Bromo.)	NI 57	NIC57	>50000		2	nM	O=S(NC1=CC=C(N(C)C(C(C)=C2)=O)C2=C1)(C3=C(OC)C=C(C#N)C=C3)=O
WDR9(2)	NI 57	NIC57	>50000		2	nM	O=S(NC1=CC=C(N(C)C(C(C)=C2)=O)C2=C1)(C3=C(OC)C=C(C#N)C=C3)=O
ATAD2A	OF-1	OF-1	>50000		2	nM	CN1C2=C(C=C(OC)C(NS(C3=C(C)C=C(Br)C=C3)(=O)=O)=C2)N(C)C1=O
ATAD2B	OF-1	OF-1	29000	4600	2	nM	CN1C2=C(C=C(OC)C(NS(C3=C(C)C=C(Br)C=C3)(=O)=O)=C2)N(C)C1=O
BAZ1B	OF-1	OF-1					CN1C2=C(C=C(OC)C(NS(C3=C(C)C=C(Br)C=C3)(=O)=O)=C2)N(C)C1=O
BAZ2A	OF-1	OF-1	13000	3200	2	nM	CN1C2=C(C=C(OC)C(NS(C3=C(C)C=C(Br)C=C3)(=O)=O)=C2)N(C)C1=O
BAZ2B	OF-1	OF-1	2500	190	2	nM	CN1C2=C(C=C(OC)C(NS(C3=C(C)C=C(Br)C=C3)(=O)=O)=C2)N(C)C1=O
BRD1	OF-1	OF-1	360	36	2	nM	CN1C2=C(C=C(OC)C(NS(C3=C(C)C=C(Br)C=C3)(=O)=O)=C2)N(C)C1=O
BRD2(1)	OF-1	OF-1	7400	590	2	nM	CN1C2=C(C=C(OC)C(NS(C3=C(C)C=C(Br)C=C3)(=O)=O)=C2)N(C)C1=O
BRD2(1,2)	OF-1	OF-1	5600	680	2	nM	CN1C2=C(C=C(OC)C(NS(C3=C(C)C=C(Br)C=C3)(=O)=O)=C2)N(C)C1=O
BRD2(2)	OF-1	OF-1	10000	990	2	nM	CN1C2=C(C=C(OC)C(NS(C3=C(C)C=C(Br)C=C3)(=O)=O)=C2)N(C)C1=O
BRD3(1)	OF-1	OF-1	5500	300	2	nM	CN1C2=C(C=C(OC)C(NS(C3=C(C)C=C(Br)C=C3)(=O)=O)=C2)N(C)C1=O
BRD3(1,2)	OF-1	OF-1	4900	150	2	nM	CN1C2=C(C=C(OC)C(NS(C3=C(C)C=C(Br)C=C3)(=O)=O)=C2)N(C)C1=O
BRD3(2)	OF-1	OF-1	16000	1200	2	nM	CN1C2=C(C=C(OC)C(NS(C3=C(C)C=C(Br)C=C3)(=O)=O)=C2)N(C)C1=O
BRD4(1)	OF-1	OF-1	3800	34	2	nM	CN1C2=C(C=C(OC)C(NS(C3=C(C)C=C(Br)C=C3)(=O)=O)=C2)N(C)C1=O
BRD4(1,2)	OF-1	OF-1	8200	1000	2	nM	CN1C2=C(C=C(OC)C(NS(C3=C(C)C=C(Br)C=C3)(=O)=O)=C2)N(C)C1=O
BRD4(2)	OF-1	OF-1	8500	1100	2	nM	CN1C2=C(C=C(OC)C(NS(C3=C(C)C=C(Br)C=C3)(=O)=O)=C2)N(C)C1=O
BRD4(full-length,short-iso.)	OF-1	OF-1	7100	850	2	nM	CN1C2=C(C=C(OC)C(NS(C3=C(C)C=C(Br)C=C3)(=O)=O)=C2)N(C)C1=O
BRD7	OF-1	OF-1	1000	9.2	2	nM	CN1C2=C(C=C(OC)C(NS(C3=C(C)C=C(Br)C=C3)(=O)=O)=C2)N(C)C1=O
BRD8(1)	OF-1	OF-1	>50000		2	nM	CN1C2=C(C=C(OC)C(NS(C3=C(C)C=C(Br)C=C3)(=O)=O)=C2)N(C)C1=O
BRD8(2)	OF-1	OF-1	>50000		2	nM	CN1C2=C(C=C(OC)C(NS(C3=C(C)C=C(Br)C=C3)(=O)=O)=C2)N(C)C1=O
BRD9	OF-1	OF-1	2900	430	2	nM	CN1C2=C(C=C(OC)C(NS(C3=C(C)C=C(Br)C=C3)(=O)=O)=C2)N(C)C1=O
BRDT(1)	OF-1	OF-1	3500	130	2	nM	CN1C2=C(C=C(OC)C(NS(C3=C(C)C=C(Br)C=C3)(=O)=O)=C2)N(C)C1=O
BRDT(1,2)	OF-1	OF-1	11000	3600	2	nM	CN1C2=C(C=C(OC)C(NS(C3=C(C)C=C(Br)C=C3)(=O)=O)=C2)N(C)C1=O
BRDT(2)	OF-1	OF-1	22000	2800	2	nM	CN1C2=C(C=C(OC)C(NS(C3=C(C)C=C(Br)C=C3)(=O)=O)=C2)N(C)C1=O
BRPF1	OF-1	OF-1	40	15	2	nM	CN1C2=C(C=C(OC)C(NS(C3=C(C)C=C(Br)C=C3)(=O)=O)=C2)N(C)C1=O
BRPF3	OF-1	OF-1	970	170	2	nM	CN1C2=C(C=C(OC)C(NS(C3=C(C)C=C(Br)C=C3)(=O)=O)=C2)N(C)C1=O
CECR2	OF-1	OF-1	>50000		2	nM	CN1C2=C(C=C(OC)C(NS(C3=C(C)C=C(Br)C=C3)(=O)=O)=C2)N(C)C1=O
CREBBP	OF-1	OF-1	45000	5200	2	nM	CN1C2=C(C=C(OC)C(NS(C3=C(C)C=C(Br)C=C3)(=O)=O)=C2)N(C)C1=O
EP300	OF-1	OF-1	47000	4000	2	nM	CN1C2=C(C=C(OC)C(NS(C3=C(C)C=C(Br)C=C3)(=O)=O)=C2)N(C)C1=O
FALZ	OF-1	OF-1	1600	1.5	2	nM	CN1C2=C(C=C(OC)C(NS(C3=C(C)C=C(Br)C=C3)(=O)=O)=C2)N(C)C1=O
GCN5L2	OF-1	OF-1	6900	500	2	nM	CN1C2=C(C=C(OC)C(NS(C3=C(C)C=C(Br)C=C3)(=O)=O)=C2)N(C)C1=O
PBRM1(2)	OF-1	OF-1	>50000		2	nM	CN1C2=C(C=C(OC)C(NS(C3=C(C)C=C(Br)C=C3)(=O)=O)=C2)N(C)C1=O
PBRM1(5)	OF-1	OF-1	4500	340	2	nM	CN1C2=C(C=C(OC)C(NS(C3=C(C)C=C(Br)C=C3)(=O)=O)=C2)N(C)C1=O
PCAF	OF-1	OF-1	12000	4500	2	nM	CN1C2=C(C=C(OC)C(NS(C3=C(C)C=C(Br)C=C3)(=O)=O)=C2)N(C)C1=O
SMARCA2	OF-1	OF-1	>50000		2	nM	CN1C2=C(C=C(OC)C(NS(C3=C(C)C=C(Br)C=C3)(=O)=O)=C2)N(C)C1=O
SMARCA2(iso.A)	OF-1	OF-1					CN1C2=C(C=C(OC)C(NS(C3=C(C)C=C(Br)C=C3)(=O)=O)=C2)N(C)C1=O
SMARCA4	OF-1	OF-1	16000	440	2	nM	CN1C2=C(C=C(OC)C(NS(C3=C(C)C=C(Br)C=C3)(=O)=O)=C2)N(C)C1=O
TAF1(2)	OF-1	OF-1	4700	520	2	nM	CN1C2=C(C=C(OC)C(NS(C3=C(C)C=C(Br)C=C3)(=O)=O)=C2)N(C)C1=O
TAF1L(2)	OF-1	OF-1	5300	660	2	nM	CN1C2=C(C=C(OC)C(NS(C3=C(C)C=C(Br)C=C3)(=O)=O)=C2)N(C)C1=O
TRIM24(Bromo.)	OF-1	OF-1	1900	570	2	nM	CN1C2=C(C=C(OC)C(NS(C3=C(C)C=C(Br)C=C3)(=O)=O)=C2)N(C)C1=O
TRIM24(PHD,Bromo.)	OF-1	OF-1	4500	150	2	nM	CN1C2=C(C=C(OC)C(NS(C3=C(C)C=C(Br)C=C3)(=O)=O)=C2)N(C)C1=O
TRIM33(PHD,Bromo.)	OF-1	OF-1	40000	6100	2	nM	CN1C2=C(C=C(OC)C(NS(C3=C(C)C=C(Br)C=C3)(=O)=O)=C2)N(C)C1=O
WDR9(2)	OF-1	OF-1	>50000		2	nM	CN1C2=C(C=C(OC)C(NS(C3=C(C)C=C(Br)C=C3)(=O)=O)=C2)N(C)C1=O
ATAD2A	PFI-3	PFI-3	>100000		4	nM	O=C(C3=C(O)C=CC=C3)/C=C/N1[C@H](C4)CN(C2=NC=CC=C2)[C@H]4C1
ATAD2B	PFI-3	PFI-3	>100000		2	nM	O=C(C3=C(O)C=CC=C3)/C=C/N1[C@H](C4)CN(C2=NC=CC=C2)[C@H]4C1
BAZ1B	PFI-3	PFI-3	>100000		2	nM	O=C(C3=C(O)C=CC=C3)/C=C/N1[C@H](C4)CN(C2=NC=CC=C2)[C@H]4C1
BAZ2A	PFI-3	PFI-3	>100000		4	nM	O=C(C3=C(O)C=CC=C3)/C=C/N1[C@H](C4)CN(C2=NC=CC=C2)[C@H]4C1
BAZ2B	PFI-3	PFI-3	>100000		2	nM	O=C(C3=C(O)C=CC=C3)/C=C/N1[C@H](C4)CN(C2=NC=CC=C2)[C@H]4C1
BRD1	PFI-3	PFI-3	>100000		2	nM	O=C(C3=C(O)C=CC=C3)/C=C/N1[C@H](C4)CN(C2=NC=CC=C2)[C@H]4C1
BRD2(1)	PFI-3	PFI-3	>100000		4	nM	O=C(C3=C(O)C=CC=C3)/C=C/N1[C@H](C4)CN(C2=NC=CC=C2)[C@H]4C1
BRD2(1,2)	PFI-3	PFI-3	>100000		2	nM	O=C(C3=C(O)C=CC=C3)/C=C/N1[C@H](C4)CN(C2=NC=CC=C2)[C@H]4C1
BRD2(2)	PFI-3	PFI-3	>100000		4	nM	O=C(C3=C(O)C=CC=C3)/C=C/N1[C@H](C4)CN(C2=NC=CC=C2)[C@H]4C1
BRD3(1)	PFI-3	PFI-3	>100000		4	nM	O=C(C3=C(O)C=CC=C3)/C=C/N1[C@H](C4)CN(C2=NC=CC=C2)[C@H]4C1
BRD3(1,2)	PFI-3	PFI-3	>100000		2	nM	O=C(C3=C(O)C=CC=C3)/C=C/N1[C@H](C4)CN(C2=NC=CC=C2)[C@H]4C1
BRD3(2)	PFI-3	PFI-3	>100000		4	nM	O=C(C3=C(O)C=CC=C3)/C=C/N1[C@H](C4)CN(C2=NC=CC=C2)[C@H]4C1
BRD4(1)	PFI-3	PFI-3	>100000		4	nM	O=C(C3=C(O)C=CC=C3)/C=C/N1[C@H](C4)CN(C2=NC=CC=C2)[C@H]4C1
BRD4(1,2)	PFI-3	PFI-3	>100000		2	nM	O=C(C3=C(O)C=CC=C3)/C=C/N1[C@H](C4)CN(C2=NC=CC=C2)[C@H]4C1
BRD4(2)	PFI-3	PFI-3	>100000		4	nM	O=C(C3=C(O)C=CC=C3)/C=C/N1[C@H](C4)CN(C2=NC=CC=C2)[C@H]4C1
BRD4(full-length,short-iso.)	PFI-3	PFI-3	>100000		2	nM	O=C(C3=C(O)C=CC=C3)/C=C/N1[C@H](C4)CN(C2=NC=CC=C2)[C@H]4C1
BRD7	PFI-3	PFI-3	>100000		2	nM	O=C(C3=C(O)C=CC=C3)/C=C/N1[C@H](C4)CN(C2=NC=CC=C2)[C@H]4C1
BRD8(1)	PFI-3	PFI-3	>100000		2	nM	O=C(C3=C(O)C=CC=C3)/C=C/N1[C@H](C4)CN(C2=NC=CC=C2)[C@H]4C1
BRD8(2)	PFI-3	PFI-3	>100000		2	nM	O=C(C3=C(O)C=CC=C3)/C=C/N1[C@H](C4)CN(C2=NC=CC=C2)[C@H]4C1
BRD9	PFI-3	PFI-3	>100000		2	nM	O=C(C3=C(O)C=CC=C3)/C=C/N1[C@H](C4)CN(C2=NC=CC=C2)[C@H]4C1
BRDT(1)	PFI-3	PFI-3	>100000		2	nM	O=C(C3=C(O)C=CC=C3)/C=C/N1[C@H](C4)CN(C2=NC=CC=C2)[C@H]4C1
BRDT(1,2)	PFI-3	PFI-3	>100000		2	nM	O=C(C3=C(O)C=CC=C3)/C=C/N1[C@H](C4)CN(C2=NC=CC=C2)[C@H]4C1
BRDT(2)	PFI-3	PFI-3	>100000		2	nM	O=C(C3=C(O)C=CC=C3)/C=C/N1[C@H](C4)CN(C2=NC=CC=C2)[C@H]4C1
BRPF1	PFI-3	PFI-3	>100000		2	nM	O=C(C3=C(O)C=CC=C3)/C=C/N1[C@H](C4)CN(C2=NC=CC=C2)[C@H]4C1
BRPF3	PFI-3	PFI-3	>100000		2	nM	O=C(C3=C(O)C=CC=C3)/C=C/N1[C@H](C4)CN(C2=NC=CC=C2)[C@H]4C1
CECR2	PFI-3	PFI-3	>100000		2	nM	O=C(C3=C(O)C=CC=C3)/C=C/N1[C@H](C4)CN(C2=NC=CC=C2)[C@H]4C1
CREBBP	PFI-3	PFI-3	>100000		2	nM	O=C(C3=C(O)C=CC=C3)/C=C/N1[C@H](C4)CN(C2=NC=CC=C2)[C@H]4C1
EP300	PFI-3	PFI-3	>100000		2	nM	O=C(C3=C(O)C=CC=C3)/C=C/N1[C@H](C4)CN(C2=NC=CC=C2)[C@H]4C1
FALZ	PFI-3	PFI-3	>100000		2	nM	O=C(C3=C(O)C=CC=C3)/C=C/N1[C@H](C4)CN(C2=NC=CC=C2)[C@H]4C1
GCN5L2	PFI-3	PFI-3	>100000		2	nM	O=C(C3=C(O)C=CC=C3)/C=C/N1[C@H](C4)CN(C2=NC=CC=C2)[C@H]4C1
PBRM1(2)	PFI-3	PFI-3	6358	170	2	nM	O=C(C3=C(O)C=CC=C3)/C=C/N1[C@H](C4)CN(C2=NC=CC=C2)[C@H]4C1
PBRM1(5)	PFI-3	PFI-3	29.9	7.1	2	nM	O=C(C3=C(O)C=CC=C3)/C=C/N1[C@H](C4)CN(C2=NC=CC=C2)[C@H]4C1
PCAF	PFI-3	PFI-3	>100000		2	nM	O=C(C3=C(O)C=CC=C3)/C=C/N1[C@H](C4)CN(C2=NC=CC=C2)[C@H]4C1
SMARCA2	PFI-3	PFI-3	34.6	0.7	2	nM	O=C(C3=C(O)C=CC=C3)/C=C/N1[C@H](C4)CN(C2=NC=CC=C2)[C@H]4C1
SMARCA2(iso.A)	PFI-3	PFI-3	75	8.5	4	nM	O=C(C3=C(O)C=CC=C3)/C=C/N1[C@H](C4)CN(C2=NC=CC=C2)[C@H]4C1
SMARCA4	PFI-3	PFI-3	31.9	3.6	2	nM	O=C(C3=C(O)C=CC=C3)/C=C/N1[C@H](C4)CN(C2=NC=CC=C2)[C@H]4C1
TAF1(2)	PFI-3	PFI-3	>100000		2	nM	O=C(C3=C(O)C=CC=C3)/C=C/N1[C@H](C4)CN(C2=NC=CC=C2)[C@H]4C1
TAF1L(2)	PFI-3	PFI-3	>100000		2	nM	O=C(C3=C(O)C=CC=C3)/C=C/N1[C@H](C4)CN(C2=NC=CC=C2)[C@H]4C1
TRIM24(Bromo.)	PFI-3	PFI-3	>100000		2	nM	O=C(C3=C(O)C=CC=C3)/C=C/N1[C@H](C4)CN(C2=NC=CC=C2)[C@H]4C1
TRIM24(PHD,Bromo.)	PFI-3	PFI-3	>100000		2	nM	O=C(C3=C(O)C=CC=C3)/C=C/N1[C@H](C4)CN(C2=NC=CC=C2)[C@H]4C1
TRIM33(PHD,Bromo.)	PFI-3	PFI-3	>100000		2	nM	O=C(C3=C(O)C=CC=C3)/C=C/N1[C@H](C4)CN(C2=NC=CC=C2)[C@H]4C1
WDR9(2)	PFI-3	PFI-3	>100000		2	nM	O=C(C3=C(O)C=CC=C3)/C=C/N1[C@H](C4)CN(C2=NC=CC=C2)[C@H]4C1
ATAD2A	PFI-4	Compound 1_Pfizer	>30000		2	nM	CN(C1=CC(NC(C2=C(OC)C=CC=C2)=O)=C(N3CCCC3)C=C1N4C)C4=O
ATAD2B	PFI-4	Compound 1_Pfizer	>30000		2	nM	CN(C1=CC(NC(C2=C(OC)C=CC=C2)=O)=C(N3CCCC3)C=C1N4C)C4=O
BAZ1B	PFI-4	Compound 1_Pfizer	>50000		2	nM	CN(C1=CC(NC(C2=C(OC)C=CC=C2)=O)=C(N3CCCC3)C=C1N4C)C4=O
BAZ2A	PFI-4	Compound 1_Pfizer	4600	1100	2	nM	CN(C1=CC(NC(C2=C(OC)C=CC=C2)=O)=C(N3CCCC3)C=C1N4C)C4=O
BAZ2B	PFI-4	Compound 1_Pfizer	2700	360	2	nM	CN(C1=CC(NC(C2=C(OC)C=CC=C2)=O)=C(N3CCCC3)C=C1N4C)C4=O
BRD1	PFI-4	Compound 1_Pfizer	270	21	2	nM	CN(C1=CC(NC(C2=C(OC)C=CC=C2)=O)=C(N3CCCC3)C=C1N4C)C4=O
BRD2(1)	PFI-4	Compound 1_Pfizer	3100	250	2	nM	CN(C1=CC(NC(C2=C(OC)C=CC=C2)=O)=C(N3CCCC3)C=C1N4C)C4=O
BRD2(1,2)	PFI-4	Compound 1_Pfizer	>30000		2	nM	CN(C1=CC(NC(C2=C(OC)C=CC=C2)=O)=C(N3CCCC3)C=C1N4C)C4=O
BRD2(2)	PFI-4	Compound 1_Pfizer	26000	1200	2	nM	CN(C1=CC(NC(C2=C(OC)C=CC=C2)=O)=C(N3CCCC3)C=C1N4C)C4=O
BRD3(1)	PFI-4	Compound 1_Pfizer	13000	2000	2	nM	CN(C1=CC(NC(C2=C(OC)C=CC=C2)=O)=C(N3CCCC3)C=C1N4C)C4=O
BRD3(1,2)	PFI-4	Compound 1_Pfizer	>30000		2	nM	CN(C1=CC(NC(C2=C(OC)C=CC=C2)=O)=C(N3CCCC3)C=C1N4C)C4=O
BRD3(2)	PFI-4	Compound 1_Pfizer	17000	1200	2	nM	CN(C1=CC(NC(C2=C(OC)C=CC=C2)=O)=C(N3CCCC3)C=C1N4C)C4=O
BRD4(1)	PFI-4	Compound 1_Pfizer	3600	82	2	nM	CN(C1=CC(NC(C2=C(OC)C=CC=C2)=O)=C(N3CCCC3)C=C1N4C)C4=O
BRD4(1,2)	PFI-4	Compound 1_Pfizer	20000	1600	2	nM	CN(C1=CC(NC(C2=C(OC)C=CC=C2)=O)=C(N3CCCC3)C=C1N4C)C4=O
BRD4(2)	PFI-4	Compound 1_Pfizer	>30000		2	nM	CN(C1=CC(NC(C2=C(OC)C=CC=C2)=O)=C(N3CCCC3)C=C1N4C)C4=O
BRD4(full-length,short-iso.)	PFI-4	Compound 1_Pfizer	5900	180	2	nM	CN(C1=CC(NC(C2=C(OC)C=CC=C2)=O)=C(N3CCCC3)C=C1N4C)C4=O
BRD7	PFI-4	Compound 1_Pfizer	2500	310	2	nM	CN(C1=CC(NC(C2=C(OC)C=CC=C2)=O)=C(N3CCCC3)C=C1N4C)C4=O
BRD8(1)	PFI-4	Compound 1_Pfizer	>30000		2	nM	CN(C1=CC(NC(C2=C(OC)C=CC=C2)=O)=C(N3CCCC3)C=C1N4C)C4=O
BRD8(2)	PFI-4	Compound 1_Pfizer	>30000		2	nM	CN(C1=CC(NC(C2=C(OC)C=CC=C2)=O)=C(N3CCCC3)C=C1N4C)C4=O
BRD9	PFI-4	Compound 1_Pfizer	2000	250	2	nM	CN(C1=CC(NC(C2=C(OC)C=CC=C2)=O)=C(N3CCCC3)C=C1N4C)C4=O
BRDT(1)	PFI-4	Compound 1_Pfizer	14000	31	2	nM	CN(C1=CC(NC(C2=C(OC)C=CC=C2)=O)=C(N3CCCC3)C=C1N4C)C4=O
BRDT(1,2)	PFI-4	Compound 1_Pfizer	26000	250	2	nM	CN(C1=CC(NC(C2=C(OC)C=CC=C2)=O)=C(N3CCCC3)C=C1N4C)C4=O
BRDT(2)	PFI-4	Compound 1_Pfizer	>30000		2	nM	CN(C1=CC(NC(C2=C(OC)C=CC=C2)=O)=C(N3CCCC3)C=C1N4C)C4=O
BRPF1	PFI-4	Compound 1_Pfizer	5.4	0.49	2	nM	CN(C1=CC(NC(C2=C(OC)C=CC=C2)=O)=C(N3CCCC3)C=C1N4C)C4=O
BRPF3	PFI-4	Compound 1_Pfizer	1700	350	2	nM	CN(C1=CC(NC(C2=C(OC)C=CC=C2)=O)=C(N3CCCC3)C=C1N4C)C4=O
CECR2	PFI-4	Compound 1_Pfizer	1500	230	2	nM	CN(C1=CC(NC(C2=C(OC)C=CC=C2)=O)=C(N3CCCC3)C=C1N4C)C4=O
CREBBP	PFI-4	Compound 1_Pfizer	>30000		2	nM	CN(C1=CC(NC(C2=C(OC)C=CC=C2)=O)=C(N3CCCC3)C=C1N4C)C4=O
EP300	PFI-4	Compound 1_Pfizer	>30000		2	nM	CN(C1=CC(NC(C2=C(OC)C=CC=C2)=O)=C(N3CCCC3)C=C1N4C)C4=O
FALZ	PFI-4	Compound 1_Pfizer	3500	400	2	nM	CN(C1=CC(NC(C2=C(OC)C=CC=C2)=O)=C(N3CCCC3)C=C1N4C)C4=O
GCN5L2	PFI-4	Compound 1_Pfizer	24000	6500	2	nM	CN(C1=CC(NC(C2=C(OC)C=CC=C2)=O)=C(N3CCCC3)C=C1N4C)C4=O
PBRM1(2)	PFI-4	Compound 1_Pfizer	>30000		2	nM	CN(C1=CC(NC(C2=C(OC)C=CC=C2)=O)=C(N3CCCC3)C=C1N4C)C4=O
PBRM1(5)	PFI-4	Compound 1_Pfizer	6500	950	2	nM	CN(C1=CC(NC(C2=C(OC)C=CC=C2)=O)=C(N3CCCC3)C=C1N4C)C4=O
PCAF	PFI-4	Compound 1_Pfizer	9100	940	2	nM	CN(C1=CC(NC(C2=C(OC)C=CC=C2)=O)=C(N3CCCC3)C=C1N4C)C4=O
SMARCA2	PFI-4	Compound 1_Pfizer	29000	280	2	nM	CN(C1=CC(NC(C2=C(OC)C=CC=C2)=O)=C(N3CCCC3)C=C1N4C)C4=O
SMARCA2(iso.A)	PFI-4	Compound 1_Pfizer	32000	4700	3	nM	CN(C1=CC(NC(C2=C(OC)C=CC=C2)=O)=C(N3CCCC3)C=C1N4C)C4=O
SMARCA4	PFI-4	Compound 1_Pfizer	23000	880	2	nM	CN(C1=CC(NC(C2=C(OC)C=CC=C2)=O)=C(N3CCCC3)C=C1N4C)C4=O
TAF1(2)	PFI-4	Compound 1_Pfizer	1900	300	2	nM	CN(C1=CC(NC(C2=C(OC)C=CC=C2)=O)=C(N3CCCC3)C=C1N4C)C4=O
TAF1L(2)	PFI-4	Compound 1_Pfizer	5100	800	2	nM	CN(C1=CC(NC(C2=C(OC)C=CC=C2)=O)=C(N3CCCC3)C=C1N4C)C4=O
TRIM24(Bromo.)	PFI-4	Compound 1_Pfizer	4900	1800	2	nM	CN(C1=CC(NC(C2=C(OC)C=CC=C2)=O)=C(N3CCCC3)C=C1N4C)C4=O
TRIM24(PHD,Bromo.)	PFI-4	Compound 1_Pfizer	3400	720	2	nM	CN(C1=CC(NC(C2=C(OC)C=CC=C2)=O)=C(N3CCCC3)C=C1N4C)C4=O
TRIM33(PHD,Bromo.)	PFI-4	Compound 1_Pfizer	>30000		2	nM	CN(C1=CC(NC(C2=C(OC)C=CC=C2)=O)=C(N3CCCC3)C=C1N4C)C4=O
WDR9(2)	PFI-4	Compound 1_Pfizer	>30000		2	nM	CN(C1=CC(NC(C2=C(OC)C=CC=C2)=O)=C(N3CCCC3)C=C1N4C)C4=O
ATAD2A	Salicylic Acid	Salicylic Acid	15000	3600	2	uM	c1ccc(c(c1)C(=O)O)O
ATAD2B	Salicylic Acid	Salicylic Acid	>14000		2	uM	c1ccc(c(c1)C(=O)O)O
BAZ1B	Salicylic Acid	Salicylic Acid	>14000		2	uM	c1ccc(c(c1)C(=O)O)O
BAZ2A	Salicylic Acid	Salicylic Acid	>14000		2	uM	c1ccc(c(c1)C(=O)O)O
BAZ2B	Salicylic Acid	Salicylic Acid	>14000		2	uM	c1ccc(c(c1)C(=O)O)O
BRD1	Salicylic Acid	Salicylic Acid	>14000		2	uM	c1ccc(c(c1)C(=O)O)O
BRD2(1)	Salicylic Acid	Salicylic Acid	>14000		2	uM	c1ccc(c(c1)C(=O)O)O
BRD2(1,2)	Salicylic Acid	Salicylic Acid	7300	5400	2	uM	c1ccc(c(c1)C(=O)O)O
BRD2(2)	Salicylic Acid	Salicylic Acid	>14000		2	uM	c1ccc(c(c1)C(=O)O)O
BRD3(1)	Salicylic Acid	Salicylic Acid	>14000		2	uM	c1ccc(c(c1)C(=O)O)O
BRD3(1,2)	Salicylic Acid	Salicylic Acid	11000	3500	2	uM	c1ccc(c(c1)C(=O)O)O
BRD3(2)	Salicylic Acid	Salicylic Acid	>14000		2	uM	c1ccc(c(c1)C(=O)O)O
BRD4(1)	Salicylic Acid	Salicylic Acid	>14000		2	uM	c1ccc(c(c1)C(=O)O)O
BRD4(1,2)	Salicylic Acid	Salicylic Acid	>14000		2	uM	c1ccc(c(c1)C(=O)O)O
BRD4(2)	Salicylic Acid	Salicylic Acid	>14000		2	uM	c1ccc(c(c1)C(=O)O)O
BRD4(full-length,short-iso.)	Salicylic Acid	Salicylic Acid	>14000		2	uM	c1ccc(c(c1)C(=O)O)O
BRD7	Salicylic Acid	Salicylic Acid	>14000		2	uM	c1ccc(c(c1)C(=O)O)O
BRD8(1)	Salicylic Acid	Salicylic Acid	>14000		2	uM	c1ccc(c(c1)C(=O)O)O
BRD8(2)	Salicylic Acid	Salicylic Acid	>14000		2	uM	c1ccc(c(c1)C(=O)O)O
BRD9	Salicylic Acid	Salicylic Acid	>14000		2	uM	c1ccc(c(c1)C(=O)O)O
BRDT(1)	Salicylic Acid	Salicylic Acid	>14000		2	uM	c1ccc(c(c1)C(=O)O)O
BRDT(1,2)	Salicylic Acid	Salicylic Acid	6100	570	2	uM	c1ccc(c(c1)C(=O)O)O
BRDT(2)	Salicylic Acid	Salicylic Acid	>14000		2	uM	c1ccc(c(c1)C(=O)O)O
BRPF1	Salicylic Acid	Salicylic Acid	4200	490	2	uM	c1ccc(c(c1)C(=O)O)O
BRPF3	Salicylic Acid	Salicylic Acid	>14000		2	uM	c1ccc(c(c1)C(=O)O)O
CECR2	Salicylic Acid	Salicylic Acid	>14000		4	uM	c1ccc(c(c1)C(=O)O)O
CREBBP	Salicylic Acid	Salicylic Acid	>14000		2	uM	c1ccc(c(c1)C(=O)O)O
EP300	Salicylic Acid	Salicylic Acid	>14000		2	uM	c1ccc(c(c1)C(=O)O)O
FALZ	Salicylic Acid	Salicylic Acid	>14000		2	uM	c1ccc(c(c1)C(=O)O)O
GCN5L2	Salicylic Acid	Salicylic Acid	>14000		2	uM	c1ccc(c(c1)C(=O)O)O
PBRM1(2)	Salicylic Acid	Salicylic Acid	1000	200	24	uM	c1ccc(c(c1)C(=O)O)O
PBRM1(5)	Salicylic Acid	Salicylic Acid	160	25	6	uM	c1ccc(c(c1)C(=O)O)O
PCAF	Salicylic Acid	Salicylic Acid	>14000		2	uM	c1ccc(c(c1)C(=O)O)O
SMARCA2	Salicylic Acid	Salicylic Acid	250	56	8	uM	c1ccc(c(c1)C(=O)O)O
SMARCA2(iso.A)	Salicylic Acid	Salicylic Acid	950	35	2	uM	c1ccc(c(c1)C(=O)O)O
SMARCA4	Salicylic Acid	Salicylic Acid	320	49	2	uM	c1ccc(c(c1)C(=O)O)O
TAF1(2)	Salicylic Acid	Salicylic Acid	>14000		2	uM	c1ccc(c(c1)C(=O)O)O
TAF1L(2)	Salicylic Acid	Salicylic Acid	>14000		2	uM	c1ccc(c(c1)C(=O)O)O
TRIM24(Bromo.)	Salicylic Acid	Salicylic Acid	>14000		2	uM	c1ccc(c(c1)C(=O)O)O
TRIM24(PHD,Bromo.)	Salicylic Acid	Salicylic Acid	>14000		2	uM	c1ccc(c(c1)C(=O)O)O
TRIM33(PHD,Bromo.)	Salicylic Acid	Salicylic Acid	>14000		2	uM	c1ccc(c(c1)C(=O)O)O
WDR9(2)	Salicylic Acid	Salicylic Acid	>14000		2	uM	c1ccc(c(c1)C(=O)O)O
ATAD2A	LP-99	SGC_BRD9_12245	>50000		2	nM	Cc1cc(=O)n(C)c2cc(N3C(=O)CC[C@H](NS(=O)(=O)CC(C)C)[C@H]3c3ccc(Cl)cc3)ccc12
ATAD2B	LP-99	SGC_BRD9_12245	>50000		2	nM	Cc1cc(=O)n(C)c2cc(N3C(=O)CC[C@H](NS(=O)(=O)CC(C)C)[C@H]3c3ccc(Cl)cc3)ccc12
BAZ1B	LP-99	SGC_BRD9_12245					Cc1cc(=O)n(C)c2cc(N3C(=O)CC[C@H](NS(=O)(=O)CC(C)C)[C@H]3c3ccc(Cl)cc3)ccc12
BAZ2A	LP-99	SGC_BRD9_12245	>50000		2	nM	Cc1cc(=O)n(C)c2cc(N3C(=O)CC[C@H](NS(=O)(=O)CC(C)C)[C@H]3c3ccc(Cl)cc3)ccc12
BAZ2B	LP-99	SGC_BRD9_12245	>50000		2	nM	Cc1cc(=O)n(C)c2cc(N3C(=O)CC[C@H](NS(=O)(=O)CC(C)C)[C@H]3c3ccc(Cl)cc3)ccc12
BRD1	LP-99	SGC_BRD9_12245	22000	60	2	nM	Cc1cc(=O)n(C)c2cc(N3C(=O)CC[C@H](NS(=O)(=O)CC(C)C)[C@H]3c3ccc(Cl)cc3)ccc12
BRD2(1)	LP-99	SGC_BRD9_12245	>50000		2	nM	Cc1cc(=O)n(C)c2cc(N3C(=O)CC[C@H](NS(=O)(=O)CC(C)C)[C@H]3c3ccc(Cl)cc3)ccc12
BRD2(1,2)	LP-99	SGC_BRD9_12245	35000	4500	2	nM	Cc1cc(=O)n(C)c2cc(N3C(=O)CC[C@H](NS(=O)(=O)CC(C)C)[C@H]3c3ccc(Cl)cc3)ccc12
BRD2(2)	LP-99	SGC_BRD9_12245	9200	3900	2	nM	Cc1cc(=O)n(C)c2cc(N3C(=O)CC[C@H](NS(=O)(=O)CC(C)C)[C@H]3c3ccc(Cl)cc3)ccc12
BRD3(1)	LP-99	SGC_BRD9_12245	44000	4500	2	nM	Cc1cc(=O)n(C)c2cc(N3C(=O)CC[C@H](NS(=O)(=O)CC(C)C)[C@H]3c3ccc(Cl)cc3)ccc12
BRD3(1,2)	LP-99	SGC_BRD9_12245	47000	2800	2	nM	Cc1cc(=O)n(C)c2cc(N3C(=O)CC[C@H](NS(=O)(=O)CC(C)C)[C@H]3c3ccc(Cl)cc3)ccc12
BRD3(2)	LP-99	SGC_BRD9_12245	>50000		2	nM	Cc1cc(=O)n(C)c2cc(N3C(=O)CC[C@H](NS(=O)(=O)CC(C)C)[C@H]3c3ccc(Cl)cc3)ccc12
BRD4(1)	LP-99	SGC_BRD9_12245	46000	2400	2	nM	Cc1cc(=O)n(C)c2cc(N3C(=O)CC[C@H](NS(=O)(=O)CC(C)C)[C@H]3c3ccc(Cl)cc3)ccc12
BRD4(1,2)	LP-99	SGC_BRD9_12245	41000	1300	2	nM	Cc1cc(=O)n(C)c2cc(N3C(=O)CC[C@H](NS(=O)(=O)CC(C)C)[C@H]3c3ccc(Cl)cc3)ccc12
BRD4(2)	LP-99	SGC_BRD9_12245	25000	3700	2	nM	Cc1cc(=O)n(C)c2cc(N3C(=O)CC[C@H](NS(=O)(=O)CC(C)C)[C@H]3c3ccc(Cl)cc3)ccc12
BRD4(full-length,short-iso.)	LP-99	SGC_BRD9_12245	>50000		2	nM	Cc1cc(=O)n(C)c2cc(N3C(=O)CC[C@H](NS(=O)(=O)CC(C)C)[C@H]3c3ccc(Cl)cc3)ccc12
BRD7	LP-99	SGC_BRD9_12245	68	14	2	nM	Cc1cc(=O)n(C)c2cc(N3C(=O)CC[C@H](NS(=O)(=O)CC(C)C)[C@H]3c3ccc(Cl)cc3)ccc12
BRD8(1)	LP-99	SGC_BRD9_12245	>50000		2	nM	Cc1cc(=O)n(C)c2cc(N3C(=O)CC[C@H](NS(=O)(=O)CC(C)C)[C@H]3c3ccc(Cl)cc3)ccc12
BRD8(2)	LP-99	SGC_BRD9_12245	>50000		2	nM	Cc1cc(=O)n(C)c2cc(N3C(=O)CC[C@H](NS(=O)(=O)CC(C)C)[C@H]3c3ccc(Cl)cc3)ccc12
BRD9	LP-99	SGC_BRD9_12245	54	4.3	2	nM	Cc1cc(=O)n(C)c2cc(N3C(=O)CC[C@H](NS(=O)(=O)CC(C)C)[C@H]3c3ccc(Cl)cc3)ccc12
BRDT(1)	LP-99	SGC_BRD9_12245	>50000		2	nM	Cc1cc(=O)n(C)c2cc(N3C(=O)CC[C@H](NS(=O)(=O)CC(C)C)[C@H]3c3ccc(Cl)cc3)ccc12
BRDT(1,2)	LP-99	SGC_BRD9_12245	21000	14000	2	nM	Cc1cc(=O)n(C)c2cc(N3C(=O)CC[C@H](NS(=O)(=O)CC(C)C)[C@H]3c3ccc(Cl)cc3)ccc12
BRDT(2)	LP-99	SGC_BRD9_12245	33000	1000	2	nM	Cc1cc(=O)n(C)c2cc(N3C(=O)CC[C@H](NS(=O)(=O)CC(C)C)[C@H]3c3ccc(Cl)cc3)ccc12
BRPF1	LP-99	SGC_BRD9_12245	43000	860	2	nM	Cc1cc(=O)n(C)c2cc(N3C(=O)CC[C@H](NS(=O)(=O)CC(C)C)[C@H]3c3ccc(Cl)cc3)ccc12
BRPF3	LP-99	SGC_BRD9_12245	>50000		2	nM	Cc1cc(=O)n(C)c2cc(N3C(=O)CC[C@H](NS(=O)(=O)CC(C)C)[C@H]3c3ccc(Cl)cc3)ccc12
CECR2	LP-99	SGC_BRD9_12245	>50000		2	nM	Cc1cc(=O)n(C)c2cc(N3C(=O)CC[C@H](NS(=O)(=O)CC(C)C)[C@H]3c3ccc(Cl)cc3)ccc12
CREBBP	LP-99	SGC_BRD9_12245	>50000		2	nM	Cc1cc(=O)n(C)c2cc(N3C(=O)CC[C@H](NS(=O)(=O)CC(C)C)[C@H]3c3ccc(Cl)cc3)ccc12
EP300	LP-99	SGC_BRD9_12245	>50000		2	nM	Cc1cc(=O)n(C)c2cc(N3C(=O)CC[C@H](NS(=O)(=O)CC(C)C)[C@H]3c3ccc(Cl)cc3)ccc12
FALZ	LP-99	SGC_BRD9_12245	>50000		2	nM	Cc1cc(=O)n(C)c2cc(N3C(=O)CC[C@H](NS(=O)(=O)CC(C)C)[C@H]3c3ccc(Cl)cc3)ccc12
GCN5L2	LP-99	SGC_BRD9_12245	>50000		2	nM	Cc1cc(=O)n(C)c2cc(N3C(=O)CC[C@H](NS(=O)(=O)CC(C)C)[C@H]3c3ccc(Cl)cc3)ccc12
PBRM1(2)	LP-99	SGC_BRD9_12245	>50000		2	nM	Cc1cc(=O)n(C)c2cc(N3C(=O)CC[C@H](NS(=O)(=O)CC(C)C)[C@H]3c3ccc(Cl)cc3)ccc12
PBRM1(5)	LP-99	SGC_BRD9_12245	>50000		2	nM	Cc1cc(=O)n(C)c2cc(N3C(=O)CC[C@H](NS(=O)(=O)CC(C)C)[C@H]3c3ccc(Cl)cc3)ccc12
PCAF	LP-99	SGC_BRD9_12245	>50000		2	nM	Cc1cc(=O)n(C)c2cc(N3C(=O)CC[C@H](NS(=O)(=O)CC(C)C)[C@H]3c3ccc(Cl)cc3)ccc12
SMARCA2	LP-99	SGC_BRD9_12245	>50000		2	nM	Cc1cc(=O)n(C)c2cc(N3C(=O)CC[C@H](NS(=O)(=O)CC(C)C)[C@H]3c3ccc(Cl)cc3)ccc12
SMARCA2(iso.A)	LP-99	SGC_BRD9_12245					Cc1cc(=O)n(C)c2cc(N3C(=O)CC[C@H](NS(=O)(=O)CC(C)C)[C@H]3c3ccc(Cl)cc3)ccc12
SMARCA4	LP-99	SGC_BRD9_12245	>50000		2	nM	Cc1cc(=O)n(C)c2cc(N3C(=O)CC[C@H](NS(=O)(=O)CC(C)C)[C@H]3c3ccc(Cl)cc3)ccc12
TAF1(2)	LP-99	SGC_BRD9_12245	>50000		2	nM	Cc1cc(=O)n(C)c2cc(N3C(=O)CC[C@H](NS(=O)(=O)CC(C)C)[C@H]3c3ccc(Cl)cc3)ccc12
TAF1L(2)	LP-99	SGC_BRD9_12245	>50000		2	nM	Cc1cc(=O)n(C)c2cc(N3C(=O)CC[C@H](NS(=O)(=O)CC(C)C)[C@H]3c3ccc(Cl)cc3)ccc12
TRIM24(Bromo.)	LP-99	SGC_BRD9_12245	>50000		2	nM	Cc1cc(=O)n(C)c2cc(N3C(=O)CC[C@H](NS(=O)(=O)CC(C)C)[C@H]3c3ccc(Cl)cc3)ccc12
TRIM24(PHD,Bromo.)	LP-99	SGC_BRD9_12245	>50000		2	nM	Cc1cc(=O)n(C)c2cc(N3C(=O)CC[C@H](NS(=O)(=O)CC(C)C)[C@H]3c3ccc(Cl)cc3)ccc12
TRIM33(PHD,Bromo.)	LP-99	SGC_BRD9_12245	>50000		2	nM	Cc1cc(=O)n(C)c2cc(N3C(=O)CC[C@H](NS(=O)(=O)CC(C)C)[C@H]3c3ccc(Cl)cc3)ccc12
WDR9(2)	LP-99	SGC_BRD9_12245	>50000		2	nM	Cc1cc(=O)n(C)c2cc(N3C(=O)CC[C@H](NS(=O)(=O)CC(C)C)[C@H]3c3ccc(Cl)cc3)ccc12
ATAD2A	SGC-CBP30	SGC-CBP30	>100000		6	nM	CC1=C(C(C)=NO1)C2=CC=C3C(N=C(CCC4=CC(Cl)=C(OC)C=C4)N3C[C@@H](N5CCOCC5)C)=C2
ATAD2B	SGC-CBP30	SGC-CBP30	>100000		2	nM	CC1=C(C(C)=NO1)C2=CC=C3C(N=C(CCC4=CC(Cl)=C(OC)C=C4)N3C[C@@H](N5CCOCC5)C)=C2
BAZ1B	SGC-CBP30	SGC-CBP30	>100000		2	nM	CC1=C(C(C)=NO1)C2=CC=C3C(N=C(CCC4=CC(Cl)=C(OC)C=C4)N3C[C@@H](N5CCOCC5)C)=C2
BAZ2A	SGC-CBP30	SGC-CBP30	69000	33000	2	nM	CC1=C(C(C)=NO1)C2=CC=C3C(N=C(CCC4=CC(Cl)=C(OC)C=C4)N3C[C@@H](N5CCOCC5)C)=C2
BAZ2B	SGC-CBP30	SGC-CBP30	>100000		4	nM	CC1=C(C(C)=NO1)C2=CC=C3C(N=C(CCC4=CC(Cl)=C(OC)C=C4)N3C[C@@H](N5CCOCC5)C)=C2
BRD1	SGC-CBP30	SGC-CBP30	21000	6900	2	nM	CC1=C(C(C)=NO1)C2=CC=C3C(N=C(CCC4=CC(Cl)=C(OC)C=C4)N3C[C@@H](N5CCOCC5)C)=C2
BRD2(1)	SGC-CBP30	SGC-CBP30	620	28	2	nM	CC1=C(C(C)=NO1)C2=CC=C3C(N=C(CCC4=CC(Cl)=C(OC)C=C4)N3C[C@@H](N5CCOCC5)C)=C2
BRD2(1,2)	SGC-CBP30	SGC-CBP30	650	190	2	nM	CC1=C(C(C)=NO1)C2=CC=C3C(N=C(CCC4=CC(Cl)=C(OC)C=C4)N3C[C@@H](N5CCOCC5)C)=C2
BRD2(2)	SGC-CBP30	SGC-CBP30	2400	700	2	nM	CC1=C(C(C)=NO1)C2=CC=C3C(N=C(CCC4=CC(Cl)=C(OC)C=C4)N3C[C@@H](N5CCOCC5)C)=C2
BRD3(1)	SGC-CBP30	SGC-CBP30	740	37	2	nM	CC1=C(C(C)=NO1)C2=CC=C3C(N=C(CCC4=CC(Cl)=C(OC)C=C4)N3C[C@@H](N5CCOCC5)C)=C2
BRD3(1,2)	SGC-CBP30	SGC-CBP30	1100	18	2	nM	CC1=C(C(C)=NO1)C2=CC=C3C(N=C(CCC4=CC(Cl)=C(OC)C=C4)N3C[C@@H](N5CCOCC5)C)=C2
BRD3(2)	SGC-CBP30	SGC-CBP30	2300	61	2	nM	CC1=C(C(C)=NO1)C2=CC=C3C(N=C(CCC4=CC(Cl)=C(OC)C=C4)N3C[C@@H](N5CCOCC5)C)=C2
BRD4(1)	SGC-CBP30	SGC-CBP30	1100	470	2	nM	CC1=C(C(C)=NO1)C2=CC=C3C(N=C(CCC4=CC(Cl)=C(OC)C=C4)N3C[C@@H](N5CCOCC5)C)=C2
BRD4(1,2)	SGC-CBP30	SGC-CBP30	3400	430	2	nM	CC1=C(C(C)=NO1)C2=CC=C3C(N=C(CCC4=CC(Cl)=C(OC)C=C4)N3C[C@@H](N5CCOCC5)C)=C2
BRD4(2)	SGC-CBP30	SGC-CBP30	6200	1400	2	nM	CC1=C(C(C)=NO1)C2=CC=C3C(N=C(CCC4=CC(Cl)=C(OC)C=C4)N3C[C@@H](N5CCOCC5)C)=C2
BRD4(full-length,short-iso.)	SGC-CBP30	SGC-CBP30	586.96	355.64	2	nM	CC1=C(C(C)=NO1)C2=CC=C3C(N=C(CCC4=CC(Cl)=C(OC)C=C4)N3C[C@@H](N5CCOCC5)C)=C2
BRD7	SGC-CBP30	SGC-CBP30	39000	3800	2	nM	CC1=C(C(C)=NO1)C2=CC=C3C(N=C(CCC4=CC(Cl)=C(OC)C=C4)N3C[C@@H](N5CCOCC5)C)=C2
BRD8(1)	SGC-CBP30	SGC-CBP30	>100000		2	nM	CC1=C(C(C)=NO1)C2=CC=C3C(N=C(CCC4=CC(Cl)=C(OC)C=C4)N3C[C@@H](N5CCOCC5)C)=C2
BRD8(2)	SGC-CBP30	SGC-CBP30	>100000		2	nM	CC1=C(C(C)=NO1)C2=CC=C3C(N=C(CCC4=CC(Cl)=C(OC)C=C4)N3C[C@@H](N5CCOCC5)C)=C2
BRD9	SGC-CBP30	SGC-CBP30	6100	2300	2	nM	CC1=C(C(C)=NO1)C2=CC=C3C(N=C(CCC4=CC(Cl)=C(OC)C=C4)N3C[C@@H](N5CCOCC5)C)=C2
BRDT(1)	SGC-CBP30	SGC-CBP30	2600	12	2	nM	CC1=C(C(C)=NO1)C2=CC=C3C(N=C(CCC4=CC(Cl)=C(OC)C=C4)N3C[C@@H](N5CCOCC5)C)=C2
BRDT(1,2)	SGC-CBP30	SGC-CBP30	3100	300	2	nM	CC1=C(C(C)=NO1)C2=CC=C3C(N=C(CCC4=CC(Cl)=C(OC)C=C4)N3C[C@@H](N5CCOCC5)C)=C2
BRDT(2)	SGC-CBP30	SGC-CBP30	>100000		2	nM	CC1=C(C(C)=NO1)C2=CC=C3C(N=C(CCC4=CC(Cl)=C(OC)C=C4)N3C[C@@H](N5CCOCC5)C)=C2
BRPF1	SGC-CBP30	SGC-CBP30	2400	460	2	nM	CC1=C(C(C)=NO1)C2=CC=C3C(N=C(CCC4=CC(Cl)=C(OC)C=C4)N3C[C@@H](N5CCOCC5)C)=C2
BRPF3	SGC-CBP30	SGC-CBP30	>100000		2	nM	CC1=C(C(C)=NO1)C2=CC=C3C(N=C(CCC4=CC(Cl)=C(OC)C=C4)N3C[C@@H](N5CCOCC5)C)=C2
CECR2	SGC-CBP30	SGC-CBP30	7900	3400	2	nM	CC1=C(C(C)=NO1)C2=CC=C3C(N=C(CCC4=CC(Cl)=C(OC)C=C4)N3C[C@@H](N5CCOCC5)C)=C2
CREBBP	SGC-CBP30	SGC-CBP30	7	3	2	nM	CC1=C(C(C)=NO1)C2=CC=C3C(N=C(CCC4=CC(Cl)=C(OC)C=C4)N3C[C@@H](N5CCOCC5)C)=C2
EP300	SGC-CBP30	SGC-CBP30	16	4	2	nM	CC1=C(C(C)=NO1)C2=CC=C3C(N=C(CCC4=CC(Cl)=C(OC)C=C4)N3C[C@@H](N5CCOCC5)C)=C2
FALZ	SGC-CBP30	SGC-CBP30	81000	22000	2	nM	CC1=C(C(C)=NO1)C2=CC=C3C(N=C(CCC4=CC(Cl)=C(OC)C=C4)N3C[C@@H](N5CCOCC5)C)=C2
GCN5L2	SGC-CBP30	SGC-CBP30	>100000		2	nM	CC1=C(C(C)=NO1)C2=CC=C3C(N=C(CCC4=CC(Cl)=C(OC)C=C4)N3C[C@@H](N5CCOCC5)C)=C2
PBRM1(2)	SGC-CBP30	SGC-CBP30	>100000		2	nM	CC1=C(C(C)=NO1)C2=CC=C3C(N=C(CCC4=CC(Cl)=C(OC)C=C4)N3C[C@@H](N5CCOCC5)C)=C2
PBRM1(5)	SGC-CBP30	SGC-CBP30	49740	12261.8	2	nM	CC1=C(C(C)=NO1)C2=CC=C3C(N=C(CCC4=CC(Cl)=C(OC)C=C4)N3C[C@@H](N5CCOCC5)C)=C2
PCAF	SGC-CBP30	SGC-CBP30	>100000		2	nM	CC1=C(C(C)=NO1)C2=CC=C3C(N=C(CCC4=CC(Cl)=C(OC)C=C4)N3C[C@@H](N5CCOCC5)C)=C2
SMARCA2	SGC-CBP30	SGC-CBP30	>100000		2	nM	CC1=C(C(C)=NO1)C2=CC=C3C(N=C(CCC4=CC(Cl)=C(OC)C=C4)N3C[C@@H](N5CCOCC5)C)=C2
SMARCA2(iso.A)	SGC-CBP30	SGC-CBP30	>100000		2	nM	CC1=C(C(C)=NO1)C2=CC=C3C(N=C(CCC4=CC(Cl)=C(OC)C=C4)N3C[C@@H](N5CCOCC5)C)=C2
SMARCA4	SGC-CBP30	SGC-CBP30	>100000		2	nM	CC1=C(C(C)=NO1)C2=CC=C3C(N=C(CCC4=CC(Cl)=C(OC)C=C4)N3C[C@@H](N5CCOCC5)C)=C2
TAF1(2)	SGC-CBP30	SGC-CBP30	3100	2	4	nM	CC1=C(C(C)=NO1)C2=CC=C3C(N=C(CCC4=CC(Cl)=C(OC)C=C4)N3C[C@@H](N5CCOCC5)C)=C2
TAF1L(2)	SGC-CBP30	SGC-CBP30	7100	180	2	nM	CC1=C(C(C)=NO1)C2=CC=C3C(N=C(CCC4=CC(Cl)=C(OC)C=C4)N3C[C@@H](N5CCOCC5)C)=C2
TRIM24(Bromo.)	SGC-CBP30	SGC-CBP30	12000	1000	2	nM	CC1=C(C(C)=NO1)C2=CC=C3C(N=C(CCC4=CC(Cl)=C(OC)C=C4)N3C[C@@H](N5CCOCC5)C)=C2
TRIM24(PHD,Bromo.)	SGC-CBP30	SGC-CBP30	6500	550	2	nM	CC1=C(C(C)=NO1)C2=CC=C3C(N=C(CCC4=CC(Cl)=C(OC)C=C4)N3C[C@@H](N5CCOCC5)C)=C2
TRIM33(PHD,Bromo.)	SGC-CBP30	SGC-CBP30	>100000		2	nM	CC1=C(C(C)=NO1)C2=CC=C3C(N=C(CCC4=CC(Cl)=C(OC)C=C4)N3C[C@@H](N5CCOCC5)C)=C2
WDR9(2)	SGC-CBP30	SGC-CBP30	12000	760	2	nM	CC1=C(C(C)=NO1)C2=CC=C3C(N=C(CCC4=CC(Cl)=C(OC)C=C4)N3C[C@@H](N5CCOCC5)C)=C2
ATAD2A	NVS-CECR2-1	BDV0006266b	>30000		2	nM	CCCS(c1nc(cc(NC2CC2)n1)c1ccc2c(ccn2C2CC(C)(C)NC(C)(C)C2)c1)(=O)=O
ATAD2B	NVS-CECR2-1	BDV0006266b	>30000		2	nM	CCCS(c1nc(cc(NC2CC2)n1)c1ccc2c(ccn2C2CC(C)(C)NC(C)(C)C2)c1)(=O)=O
BAZ2A	NVS-CECR2-1	BDV0006266b	>30000		2	nM	CCCS(c1nc(cc(NC2CC2)n1)c1ccc2c(ccn2C2CC(C)(C)NC(C)(C)C2)c1)(=O)=O
BAZ2B	NVS-CECR2-1	BDV0006266b	>30000		2	nM	CCCS(c1nc(cc(NC2CC2)n1)c1ccc2c(ccn2C2CC(C)(C)NC(C)(C)C2)c1)(=O)=O
BRD1	NVS-CECR2-1	BDV0006266b	>30000		2	nM	CCCS(c1nc(cc(NC2CC2)n1)c1ccc2c(ccn2C2CC(C)(C)NC(C)(C)C2)c1)(=O)=O
BRD2(1)	NVS-CECR2-1	BDV0006266b	>30000		2	nM	CCCS(c1nc(cc(NC2CC2)n1)c1ccc2c(ccn2C2CC(C)(C)NC(C)(C)C2)c1)(=O)=O
BRD2(1,2)	NVS-CECR2-1	BDV0006266b	16000	3900	2	nM	CCCS(c1nc(cc(NC2CC2)n1)c1ccc2c(ccn2C2CC(C)(C)NC(C)(C)C2)c1)(=O)=O
BRD2(2)	NVS-CECR2-1	BDV0006266b	>30000		2	nM	CCCS(c1nc(cc(NC2CC2)n1)c1ccc2c(ccn2C2CC(C)(C)NC(C)(C)C2)c1)(=O)=O
BRD3(1)	NVS-CECR2-1	BDV0006266b	>30000		2	nM	CCCS(c1nc(cc(NC2CC2)n1)c1ccc2c(ccn2C2CC(C)(C)NC(C)(C)C2)c1)(=O)=O
BRD3(1,2)	NVS-CECR2-1	BDV0006266b	>30000		2	nM	CCCS(c1nc(cc(NC2CC2)n1)c1ccc2c(ccn2C2CC(C)(C)NC(C)(C)C2)c1)(=O)=O
BRD3(2)	NVS-CECR2-1	BDV0006266b	>30000		2	nM	CCCS(c1nc(cc(NC2CC2)n1)c1ccc2c(ccn2C2CC(C)(C)NC(C)(C)C2)c1)(=O)=O
BRD4(1)	NVS-CECR2-1	BDV0006266b	21000	3300	2	nM	CCCS(c1nc(cc(NC2CC2)n1)c1ccc2c(ccn2C2CC(C)(C)NC(C)(C)C2)c1)(=O)=O
BRD4(1,2)	NVS-CECR2-1	BDV0006266b	12000	3200	2	nM	CCCS(c1nc(cc(NC2CC2)n1)c1ccc2c(ccn2C2CC(C)(C)NC(C)(C)C2)c1)(=O)=O
BRD4(2)	NVS-CECR2-1	BDV0006266b	5700	1300	2	nM	CCCS(c1nc(cc(NC2CC2)n1)c1ccc2c(ccn2C2CC(C)(C)NC(C)(C)C2)c1)(=O)=O
BRD4(full-length,short-iso.)	NVS-CECR2-1	BDV0006266b	13000	750	2	nM	CCCS(c1nc(cc(NC2CC2)n1)c1ccc2c(ccn2C2CC(C)(C)NC(C)(C)C2)c1)(=O)=O
BRD7	NVS-CECR2-1	BDV0006266b	6800	2400	2	nM	CCCS(c1nc(cc(NC2CC2)n1)c1ccc2c(ccn2C2CC(C)(C)NC(C)(C)C2)c1)(=O)=O
BRD8(1)	NVS-CECR2-1	BDV0006266b	>30000		2	nM	CCCS(c1nc(cc(NC2CC2)n1)c1ccc2c(ccn2C2CC(C)(C)NC(C)(C)C2)c1)(=O)=O
BRD8(2)	NVS-CECR2-1	BDV0006266b	>30000		2	nM	CCCS(c1nc(cc(NC2CC2)n1)c1ccc2c(ccn2C2CC(C)(C)NC(C)(C)C2)c1)(=O)=O
BRD9	NVS-CECR2-1	BDV0006266b	2100	940	2	nM	CCCS(c1nc(cc(NC2CC2)n1)c1ccc2c(ccn2C2CC(C)(C)NC(C)(C)C2)c1)(=O)=O
BRDT(1)	NVS-CECR2-1	BDV0006266b	>30000		2	nM	CCCS(c1nc(cc(NC2CC2)n1)c1ccc2c(ccn2C2CC(C)(C)NC(C)(C)C2)c1)(=O)=O
BRDT(1,2)	NVS-CECR2-1	BDV0006266b	14000	1000	2	nM	CCCS(c1nc(cc(NC2CC2)n1)c1ccc2c(ccn2C2CC(C)(C)NC(C)(C)C2)c1)(=O)=O
BRDT(2)	NVS-CECR2-1	BDV0006266b	>30000		2	nM	CCCS(c1nc(cc(NC2CC2)n1)c1ccc2c(ccn2C2CC(C)(C)NC(C)(C)C2)c1)(=O)=O
BRPF1	NVS-CECR2-1	BDV0006266b	3500	670	2	nM	CCCS(c1nc(cc(NC2CC2)n1)c1ccc2c(ccn2C2CC(C)(C)NC(C)(C)C2)c1)(=O)=O
BRPF3	NVS-CECR2-1	BDV0006266b	>30000		2	nM	CCCS(c1nc(cc(NC2CC2)n1)c1ccc2c(ccn2C2CC(C)(C)NC(C)(C)C2)c1)(=O)=O
CECR2	NVS-CECR2-1	BDV0006266b	14	1.6	2	nM	CCCS(c1nc(cc(NC2CC2)n1)c1ccc2c(ccn2C2CC(C)(C)NC(C)(C)C2)c1)(=O)=O
CREBBP	NVS-CECR2-1	BDV0006266b	>30000		2	nM	CCCS(c1nc(cc(NC2CC2)n1)c1ccc2c(ccn2C2CC(C)(C)NC(C)(C)C2)c1)(=O)=O
EP300	NVS-CECR2-1	BDV0006266b	>30000		2	nM	CCCS(c1nc(cc(NC2CC2)n1)c1ccc2c(ccn2C2CC(C)(C)NC(C)(C)C2)c1)(=O)=O
FALZ	NVS-CECR2-1	BDV0006266b	360	42	2	nM	CCCS(c1nc(cc(NC2CC2)n1)c1ccc2c(ccn2C2CC(C)(C)NC(C)(C)C2)c1)(=O)=O
GCN5L2	NVS-CECR2-1	BDV0006266b	>30000		2	nM	CCCS(c1nc(cc(NC2CC2)n1)c1ccc2c(ccn2C2CC(C)(C)NC(C)(C)C2)c1)(=O)=O
PBRM1(2)	NVS-CECR2-1	BDV0006266b	>30000		2	nM	CCCS(c1nc(cc(NC2CC2)n1)c1ccc2c(ccn2C2CC(C)(C)NC(C)(C)C2)c1)(=O)=O
PBRM1(5)	NVS-CECR2-1	BDV0006266b	>30000		2	nM	CCCS(c1nc(cc(NC2CC2)n1)c1ccc2c(ccn2C2CC(C)(C)NC(C)(C)C2)c1)(=O)=O
PCAF	NVS-CECR2-1	BDV0006266b	>30000		2	nM	CCCS(c1nc(cc(NC2CC2)n1)c1ccc2c(ccn2C2CC(C)(C)NC(C)(C)C2)c1)(=O)=O
SMARCA2	NVS-CECR2-1	BDV0006266b	>30000		2	nM	CCCS(c1nc(cc(NC2CC2)n1)c1ccc2c(ccn2C2CC(C)(C)NC(C)(C)C2)c1)(=O)=O
SMARCA4	NVS-CECR2-1	BDV0006266b	>30000		2	nM	CCCS(c1nc(cc(NC2CC2)n1)c1ccc2c(ccn2C2CC(C)(C)NC(C)(C)C2)c1)(=O)=O
TAF1(2)	NVS-CECR2-1	BDV0006266b	2100	66	2	nM	CCCS(c1nc(cc(NC2CC2)n1)c1ccc2c(ccn2C2CC(C)(C)NC(C)(C)C2)c1)(=O)=O
TAF1L(2)	NVS-CECR2-1	BDV0006266b	9600	340	2	nM	CCCS(c1nc(cc(NC2CC2)n1)c1ccc2c(ccn2C2CC(C)(C)NC(C)(C)C2)c1)(=O)=O
TRIM24(Bromo.)	NVS-CECR2-1	BDV0006266b	>30000		2	nM	CCCS(c1nc(cc(NC2CC2)n1)c1ccc2c(ccn2C2CC(C)(C)NC(C)(C)C2)c1)(=O)=O
TRIM24(PHD,Bromo.)	NVS-CECR2-1	BDV0006266b	>30000		2	nM	CCCS(c1nc(cc(NC2CC2)n1)c1ccc2c(ccn2C2CC(C)(C)NC(C)(C)C2)c1)(=O)=O
TRIM33(PHD,Bromo.)	NVS-CECR2-1	BDV0006266b	>30000		2	nM	CCCS(c1nc(cc(NC2CC2)n1)c1ccc2c(ccn2C2CC(C)(C)NC(C)(C)C2)c1)(=O)=O
WDR9(2)	NVS-CECR2-1	BDV0006266b	30000	400	2	nM	CCCS(c1nc(cc(NC2CC2)n1)c1ccc2c(ccn2C2CC(C)(C)NC(C)(C)C2)c1)(=O)=O
ATAD2A	PFI-3 D1	BDF25472461a	>30000		2	nM	C1CC1Nc1c2C[C@@H]3CC[C@H](c2ncn1)N3C=CC(c1ccccc1O)=O
ATAD2B	PFI-3 D1	BDF25472461a	>30000		2	nM	C1CC1Nc1c2C[C@@H]3CC[C@H](c2ncn1)N3C=CC(c1ccccc1O)=O
BAZ2A	PFI-3 D1	BDF25472461a	>30000		2	nM	C1CC1Nc1c2C[C@@H]3CC[C@H](c2ncn1)N3C=CC(c1ccccc1O)=O
BAZ2B	PFI-3 D1	BDF25472461a	>30000		2	nM	C1CC1Nc1c2C[C@@H]3CC[C@H](c2ncn1)N3C=CC(c1ccccc1O)=O
BRD1	PFI-3 D1	BDF25472461a	>30000		2	nM	C1CC1Nc1c2C[C@@H]3CC[C@H](c2ncn1)N3C=CC(c1ccccc1O)=O
BRD2(1)	PFI-3 D1	BDF25472461a	>30000		2	nM	C1CC1Nc1c2C[C@@H]3CC[C@H](c2ncn1)N3C=CC(c1ccccc1O)=O
BRD2(1,2)	PFI-3 D1	BDF25472461a	>30000		2	nM	C1CC1Nc1c2C[C@@H]3CC[C@H](c2ncn1)N3C=CC(c1ccccc1O)=O
BRD2(2)	PFI-3 D1	BDF25472461a	>30000		2	nM	C1CC1Nc1c2C[C@@H]3CC[C@H](c2ncn1)N3C=CC(c1ccccc1O)=O
BRD3(1)	PFI-3 D1	BDF25472461a	>30000		2	nM	C1CC1Nc1c2C[C@@H]3CC[C@H](c2ncn1)N3C=CC(c1ccccc1O)=O
BRD3(1,2)	PFI-3 D1	BDF25472461a	>30000		2	nM	C1CC1Nc1c2C[C@@H]3CC[C@H](c2ncn1)N3C=CC(c1ccccc1O)=O
BRD3(2)	PFI-3 D1	BDF25472461a	>30000		2	nM	C1CC1Nc1c2C[C@@H]3CC[C@H](c2ncn1)N3C=CC(c1ccccc1O)=O
BRD4(1)	PFI-3 D1	BDF25472461a	27000	3700	2	nM	C1CC1Nc1c2C[C@@H]3CC[C@H](c2ncn1)N3C=CC(c1ccccc1O)=O
BRD4(1,2)	PFI-3 D1	BDF25472461a	>30000		2	nM	C1CC1Nc1c2C[C@@H]3CC[C@H](c2ncn1)N3C=CC(c1ccccc1O)=O
BRD4(2)	PFI-3 D1	BDF25472461a	>30000		2	nM	C1CC1Nc1c2C[C@@H]3CC[C@H](c2ncn1)N3C=CC(c1ccccc1O)=O
BRD4(full-length,short-iso.)	PFI-3 D1	BDF25472461a	>30000		2	nM	C1CC1Nc1c2C[C@@H]3CC[C@H](c2ncn1)N3C=CC(c1ccccc1O)=O
BRD7	PFI-3 D1	BDF25472461a	>30000		2	nM	C1CC1Nc1c2C[C@@H]3CC[C@H](c2ncn1)N3C=CC(c1ccccc1O)=O
BRD8(1)	PFI-3 D1	BDF25472461a	>30000		2	nM	C1CC1Nc1c2C[C@@H]3CC[C@H](c2ncn1)N3C=CC(c1ccccc1O)=O
BRD8(2)	PFI-3 D1	BDF25472461a	>30000		2	nM	C1CC1Nc1c2C[C@@H]3CC[C@H](c2ncn1)N3C=CC(c1ccccc1O)=O
BRD9	PFI-3 D1	BDF25472461a	>30000		2	nM	C1CC1Nc1c2C[C@@H]3CC[C@H](c2ncn1)N3C=CC(c1ccccc1O)=O
BRDT(1)	PFI-3 D1	BDF25472461a	24000	5100	2	nM	C1CC1Nc1c2C[C@@H]3CC[C@H](c2ncn1)N3C=CC(c1ccccc1O)=O
BRDT(1,2)	PFI-3 D1	BDF25472461a	>30000		2	nM	C1CC1Nc1c2C[C@@H]3CC[C@H](c2ncn1)N3C=CC(c1ccccc1O)=O
BRDT(2)	PFI-3 D1	BDF25472461a	>30000		2	nM	C1CC1Nc1c2C[C@@H]3CC[C@H](c2ncn1)N3C=CC(c1ccccc1O)=O
BRPF1	PFI-3 D1	BDF25472461a	>30000		2	nM	C1CC1Nc1c2C[C@@H]3CC[C@H](c2ncn1)N3C=CC(c1ccccc1O)=O
BRPF3	PFI-3 D1	BDF25472461a	>30000		2	nM	C1CC1Nc1c2C[C@@H]3CC[C@H](c2ncn1)N3C=CC(c1ccccc1O)=O
CECR2	PFI-3 D1	BDF25472461a	>30000		2	nM	C1CC1Nc1c2C[C@@H]3CC[C@H](c2ncn1)N3C=CC(c1ccccc1O)=O
CREBBP	PFI-3 D1	BDF25472461a	>30000		2	nM	C1CC1Nc1c2C[C@@H]3CC[C@H](c2ncn1)N3C=CC(c1ccccc1O)=O
EP300	PFI-3 D1	BDF25472461a	>30000		2	nM	C1CC1Nc1c2C[C@@H]3CC[C@H](c2ncn1)N3C=CC(c1ccccc1O)=O
FALZ	PFI-3 D1	BDF25472461a	>30000		2	nM	C1CC1Nc1c2C[C@@H]3CC[C@H](c2ncn1)N3C=CC(c1ccccc1O)=O
GCN5L2	PFI-3 D1	BDF25472461a	23000	8400	2	nM	C1CC1Nc1c2C[C@@H]3CC[C@H](c2ncn1)N3C=CC(c1ccccc1O)=O
PBRM1(2)	PFI-3 D1	BDF25472461a	170	10	2	nM	C1CC1Nc1c2C[C@@H]3CC[C@H](c2ncn1)N3C=CC(c1ccccc1O)=O
PBRM1(5)	PFI-3 D1	BDF25472461a	36	5.6	2	nM	C1CC1Nc1c2C[C@@H]3CC[C@H](c2ncn1)N3C=CC(c1ccccc1O)=O
PCAF	PFI-3 D1	BDF25472461a	>30000		2	nM	C1CC1Nc1c2C[C@@H]3CC[C@H](c2ncn1)N3C=CC(c1ccccc1O)=O
SMARCA2	PFI-3 D1	BDF25472461a	49	0.8	2	nM	C1CC1Nc1c2C[C@@H]3CC[C@H](c2ncn1)N3C=CC(c1ccccc1O)=O
SMARCA4	PFI-3 D1	BDF25472461a	46	1.4	2	nM	C1CC1Nc1c2C[C@@H]3CC[C@H](c2ncn1)N3C=CC(c1ccccc1O)=O
TAF1(2)	PFI-3 D1	BDF25472461a	>30000		2	nM	C1CC1Nc1c2C[C@@H]3CC[C@H](c2ncn1)N3C=CC(c1ccccc1O)=O
TAF1L(2)	PFI-3 D1	BDF25472461a	>30000		2	nM	C1CC1Nc1c2C[C@@H]3CC[C@H](c2ncn1)N3C=CC(c1ccccc1O)=O
TRIM24(Bromo.)	PFI-3 D1	BDF25472461a	>30000		2	nM	C1CC1Nc1c2C[C@@H]3CC[C@H](c2ncn1)N3C=CC(c1ccccc1O)=O
TRIM24(PHD,Bromo.)	PFI-3 D1	BDF25472461a	>30000		2	nM	C1CC1Nc1c2C[C@@H]3CC[C@H](c2ncn1)N3C=CC(c1ccccc1O)=O
TRIM33(PHD,Bromo.)	PFI-3 D1	BDF25472461a	>30000		2	nM	C1CC1Nc1c2C[C@@H]3CC[C@H](c2ncn1)N3C=CC(c1ccccc1O)=O
WDR9(2)	PFI-3 D1	BDF25472461a	>30000		2	nM	C1CC1Nc1c2C[C@@H]3CC[C@H](c2ncn1)N3C=CC(c1ccccc1O)=O

## Sheet: Sheet3
BRD	Bromosporine	NVS-CECR2-1	NIC57	OF-1	PFI-4	BAZ2-ICR	GSK2801	SGC-BRD9	SGC-CBP30	CBP30-298	CBP30-383	I-CBP112	PFI-3 D1	PFI-3	Salicylic Acid
ATAD2A	62000	50000	50000	100000	50000	50000	50000	50000	50000	50000	50000	50000	50000	50000	15000
ATAD2B	30000	50000	50000	29000	50000	50000	50000	50000	50000	50000	50000	71000	50000	50000	50000
BAZ1B	38000	50000	50000	50000	50000	50000	50000	50000	50000	100000	100000	50000	50000	50000	50000
BAZ2A	3800	50000	50000	13000	4600	50000	430	50000	50000	55000	75000	70000	50000	50000	50000
BAZ2B	9100	50000	9400	2500	2700	7.6	170	50000	50000	50000	50000	28000	50000	50000	50000
BRD1	1100	50000	46	360	270	21000	50000	22000	21000	46000	47000	51000	50000	50000	50000
BRD2(1)	220	50000	5900	7400	3100	50000	41000	50000	620	780	1500	5700	50000	50000	50000
BRD2(1,2)	66.5	50000	12000	5600	50000	45000	19000	35000	650	100000	100000	6900	50000	50000	7300
BRD2(2)	84	50000	50000	10000	50000	50000	22000	9200	2400	1800	3600	26000	50000	50000	50000
BRD3(1)	160	50000	7200	5500	13000	40000	34000	44000	740	960	1400	5400	50000	50000	50000
BRD3(1,2)	30	50000	12000	4900	50000	50000	17000	47000	1100	100000	100000	6300	50000	50000	11000
BRD3(2)	76	50000	50000	16000	17000	50000	13000	100000	2300	1600	4600	20000	50000	50000	50000
BRD4(1)	38	21000	3300	3800	3600	50000	74000	46000	1100	520	700	2900	50000	50000	50000
BRD4(1,2)	30.5	12000	15000	8200	20000	50000	65000	41000	3400	100000	100000	11000	50000	50000	50000
BRD4(2)	40	5700	50000	8500	50000	50000	29000	25000	6200	2700	6900	16000	50000	50000	50000
BRD4(fl)	25.5	13000	4900	7100	5900	50000	41000	50000	586.96	100000	100000	2854.47	50000	50000	50000
BRD7	82	6800	4900	1000	2500	50000	22000	68	39000	100000	100000	7600	50000	50000	50000
BRD8(1)	28000	50000	4900	50000	50000	50000	50000	50000	50000	100000	100000	50000	50000	50000	50000
BRD8(2)	40000	50000	4900	50000	50000	50000	50000	50000	50000	100000	100000	50000	50000	50000	50000
BRD9	6	2100	4900	2900	2000	50000	120	54	6100	12000	10000	25000	50000	50000	50000
BRDT(1)	58	50000	4900	3500	14000	50000	30000	50000	2600	1800	3600	4200	50000	50000	50000
BRDT(1,2)	87	14000	4900	11000	26000	50000	52000	21000	3100	100000	100000	9600	50000	50000	6100
BRDT(2)	260	50000	4900	22000	50000	50000	67000	33000	50000	6800	18000	49000	50000	50000	50000
BRPF1	600	3500	4900	40	5.4	50000	14000	43000	2400	18000	11000	20000	50000	50000	4200
BRPF3	6000	50000	4900	970	1700	50000	15000	50000	50000	50000	50000	95000	50000	50000	50000
CECR2	11	14	4900	50000	1500	1000	9000	50000	7900	100000	100000	17000	50000	50000	50000
CREBBP	950	50000	4900	45000	50000	21000	21000	50000	7	140	59	60	50000	50000	50000
EP300	1600	50000	4900	47000	50000	41000	70000	50000	16	92	44	120	50000	50000	50000
FALZ	3300	360	4900	1600	3500	44000	95000	50000	81000	50000	50000	5500	50000	50000	50000
GCN5L2	12000	50000	4900	6900	24000	50000	50000	50000	50000	100000	100000	50000	50000	50000	50000
PBRM1(2)	50000	50000	4900	50000	50000	50000	50000	50000	50000	42000	44000	50000	170	6358	1000
PBRM1(5)	27000	50000	4900	4500	6500	50000	50000	50000	50000	100000	100000	50000	36	29.9	160
PCAF	11000	50000	4900	12000	9100	15000	50000	50000	50000	100000	100000	77000	50000	50000	50000
SMARCA2	4600	50000	4900	50000	29000	50000	50000	50000	50000	100000	100000	50000	49	34.6	250
SMARCA2(iso.A)	6200	50000	4900	50000	32000	50000	50000	50000	50000	100000	100000	50000		75	950
SMARCA4	4000	50000	4900	16000	23000	50000	50000	50000	50000	100000	100000	50000	46	31.9	320
TAF1(2)	3.6	2100	4900	4700	1900	50000	1400	50000	3100	5800	1600	45000	50000	50000	50000
TAF1L(2)	11	9600	4900	5300	5100	50000	5100	50000	7100	17000	14000	52000	50000	50000	50000
TRIM24	6800	50000	4900	1900	4900	50000	24000	50000	12000	100000	100000	12000	50000	50000	50000
TRIM24(PHD,BRD)	29000	50000	4900	4500	3400	50000	33000	50000	6500	17000	26000	14000	50000	50000	50000
TRIM33(PHD,BRD)	50000	50000	4900	40000	50000	50000	50000	50000	50000	50000	50000	50000	50000	50000	50000
WDR9(2)	50000	50000	4900	50000	50000	50000	50000	50000	12000	30000	41000	59000	50000	50000	50000
